# Supplementary material for: Efficient synthesis of functionalized dihydroquinolines, quinolines and dihydrobenzo[b]azepine via an iron(iii) chloride-catalyzed intramolecular alkyne–carbonyl metathesis of alkyne tethered 2-amino benzaldehyde/acetophenone derivatives
Source: Royal Society of Chemistry journal article supplement (doi:10.1039/c3ob42292e), 2014-01-01
Supplement: c3ob42292e.pdf [file c3ob42292e.pdf]

## ***Supporting Information***

Efficient synthesis of functionalized dihydroquinolines, quinolines and dihydrobenzo[*b*]azepine *via* an iron(III) chloride-catalyzed intramolecular alkyne-carbonyl metathesis of alkyne tethered 2-amino benzaldehyde/acetophenone derivatives

Swapnadeep Jalal,<sup>a</sup> Krishnendu Bera,<sup>a</sup> Soumen Sarkar,<sup>a</sup> Kartick Paul,<sup>a</sup> and Umasish Jana\*<sup>a</sup>

<sup>a</sup>Department of Chemistry, Jadavpur University, Kolkata-700032, INDIA

**E-mail:** jumasish2004@yahoo.co.in; umasish@gmail.com

### ***Table of Contents***

|                                                                                                              |       |
|--------------------------------------------------------------------------------------------------------------|-------|
| <sup>1</sup> H & <sup>13</sup> C NMR spectra of compounds (2a-2j, 4a-4b, 3a-3j, 5a-5b, 6a-6c, 7a-7d, 8a-8d): | p2–35 |
| Crystal Structure of the compound 3b:                                                                        | p36   |

$^1\text{H}$  NMR of compound **2a**

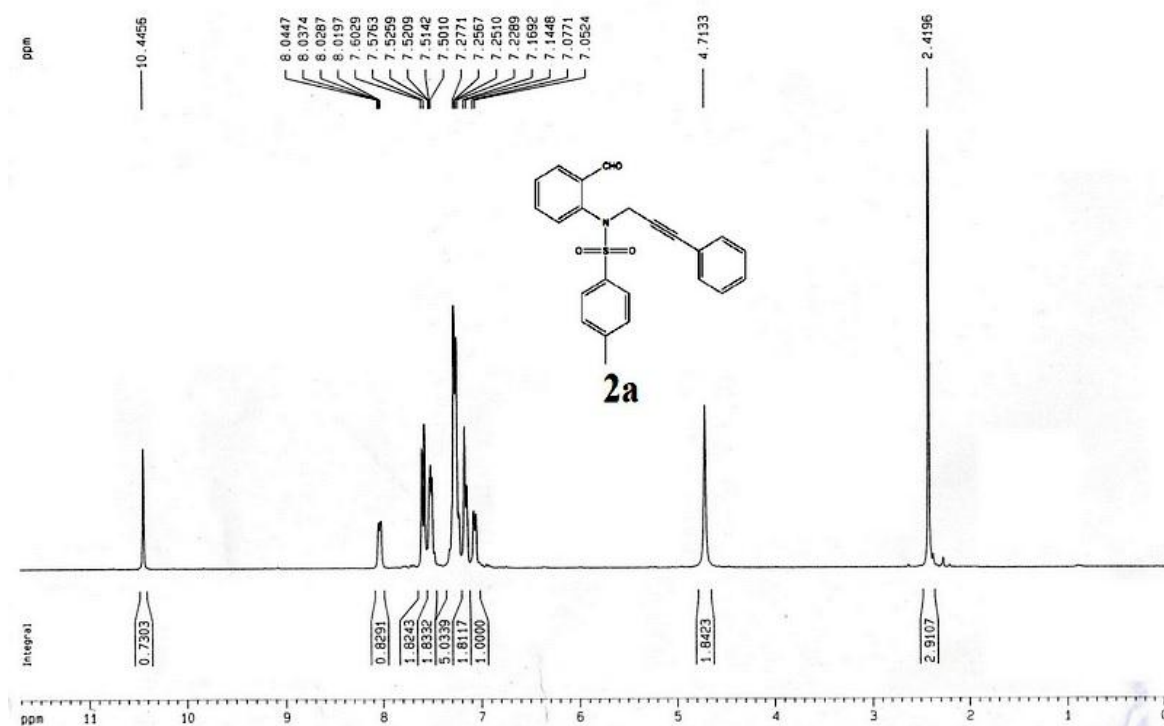

$^{13}\text{C}$  NMR of compound **2a**

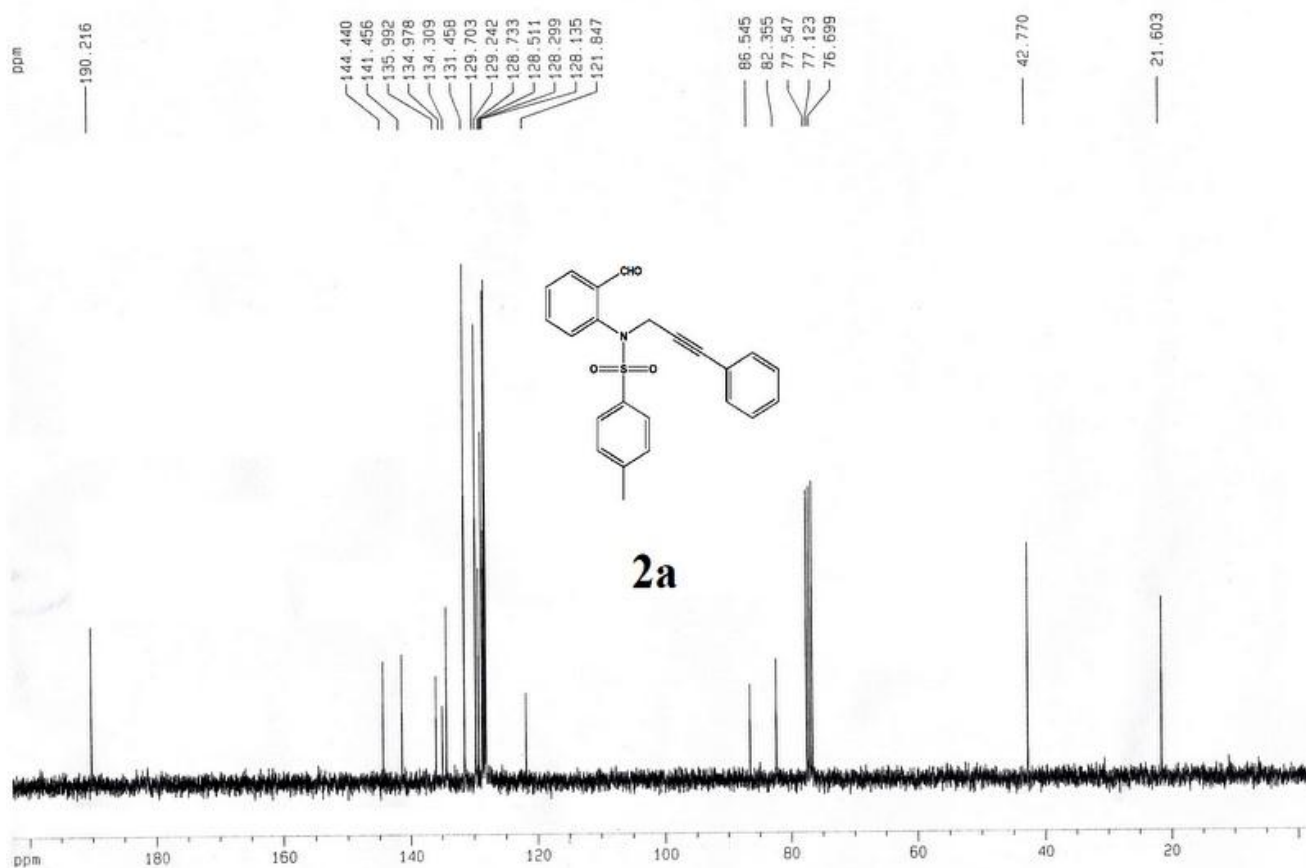

# <sup>1</sup>H NMR of compound **2b**

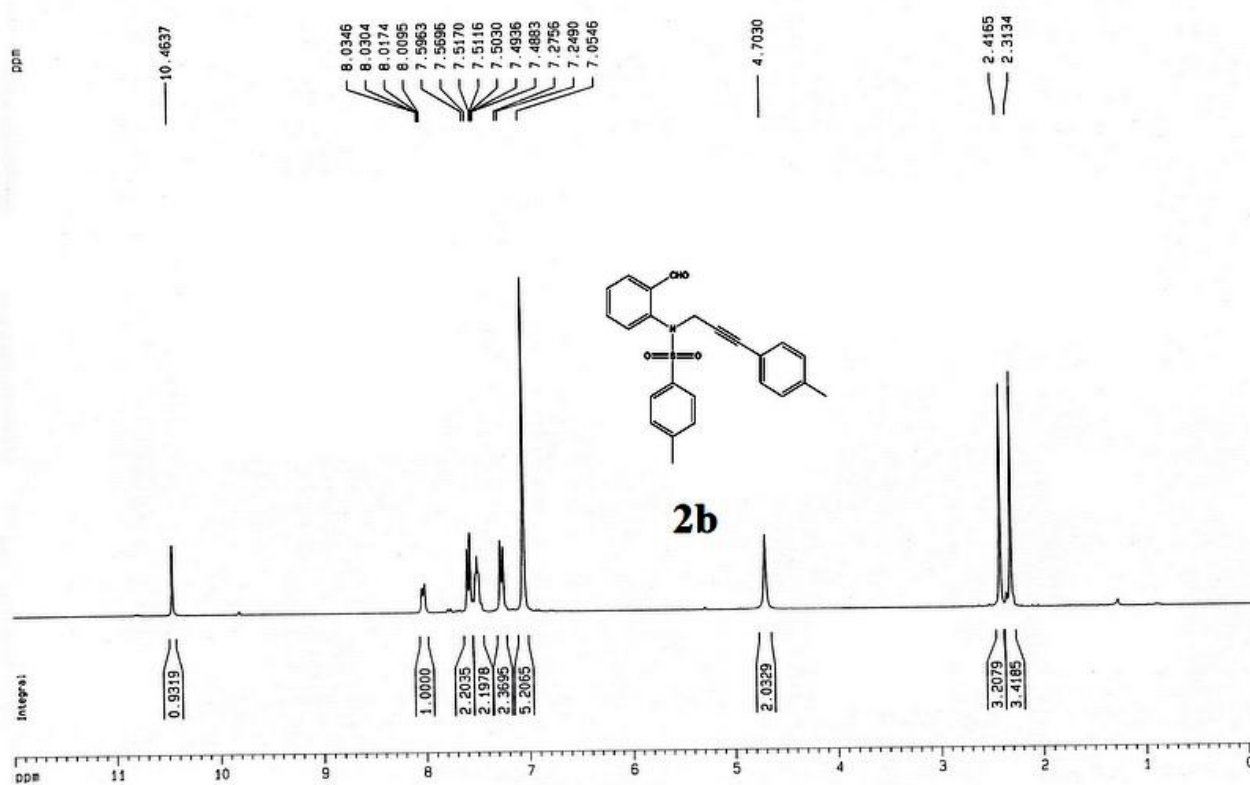

# <sup>13</sup>C NMR of compound **2b**

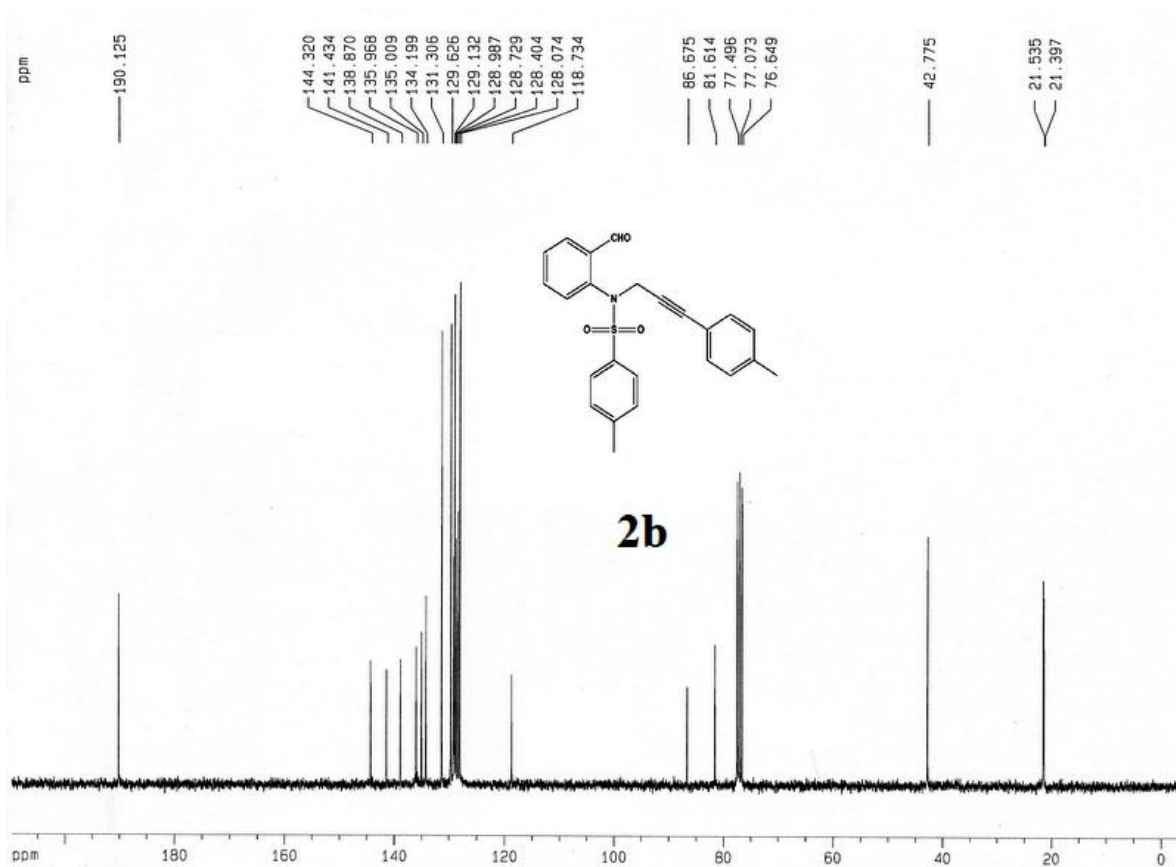

<sup>1</sup>H NMR of compound **2c**

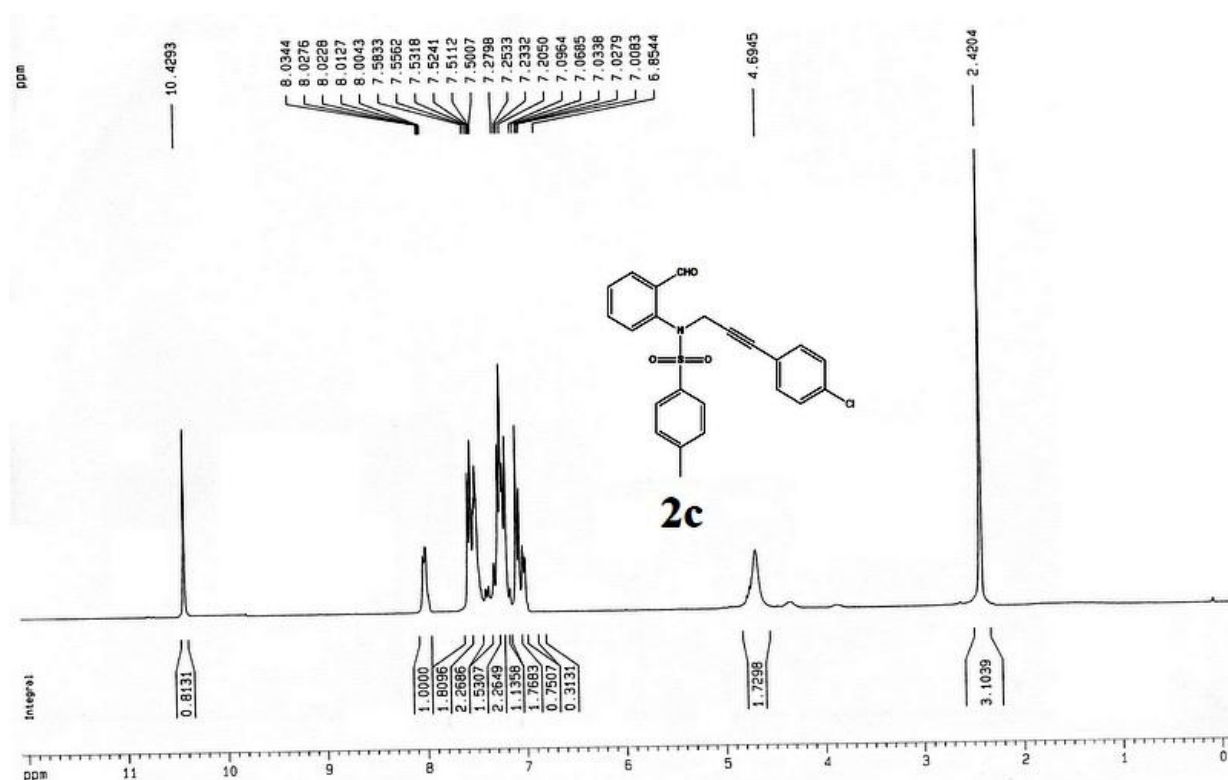

<sup>13</sup>C NMR of compound **2c**

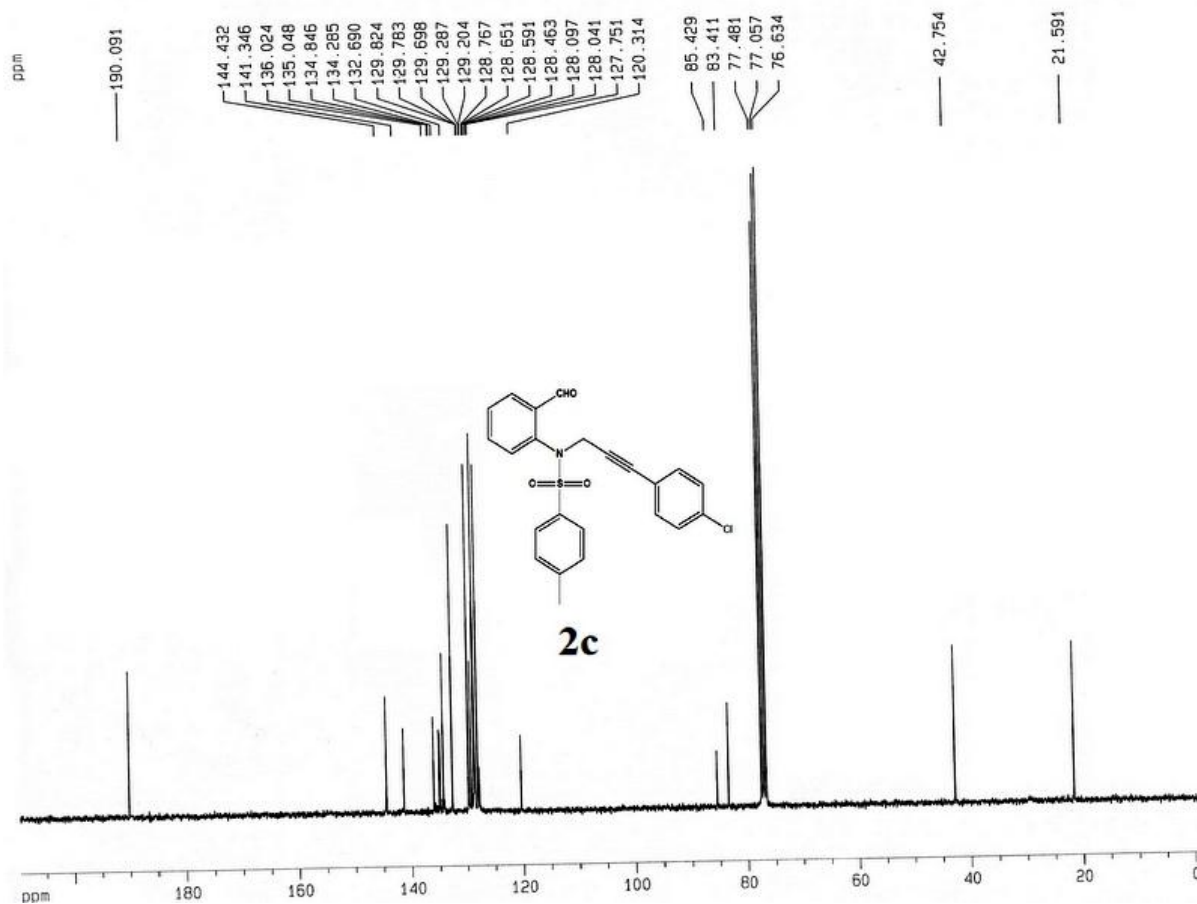

<sup>1</sup>H NMR of compound **2d**

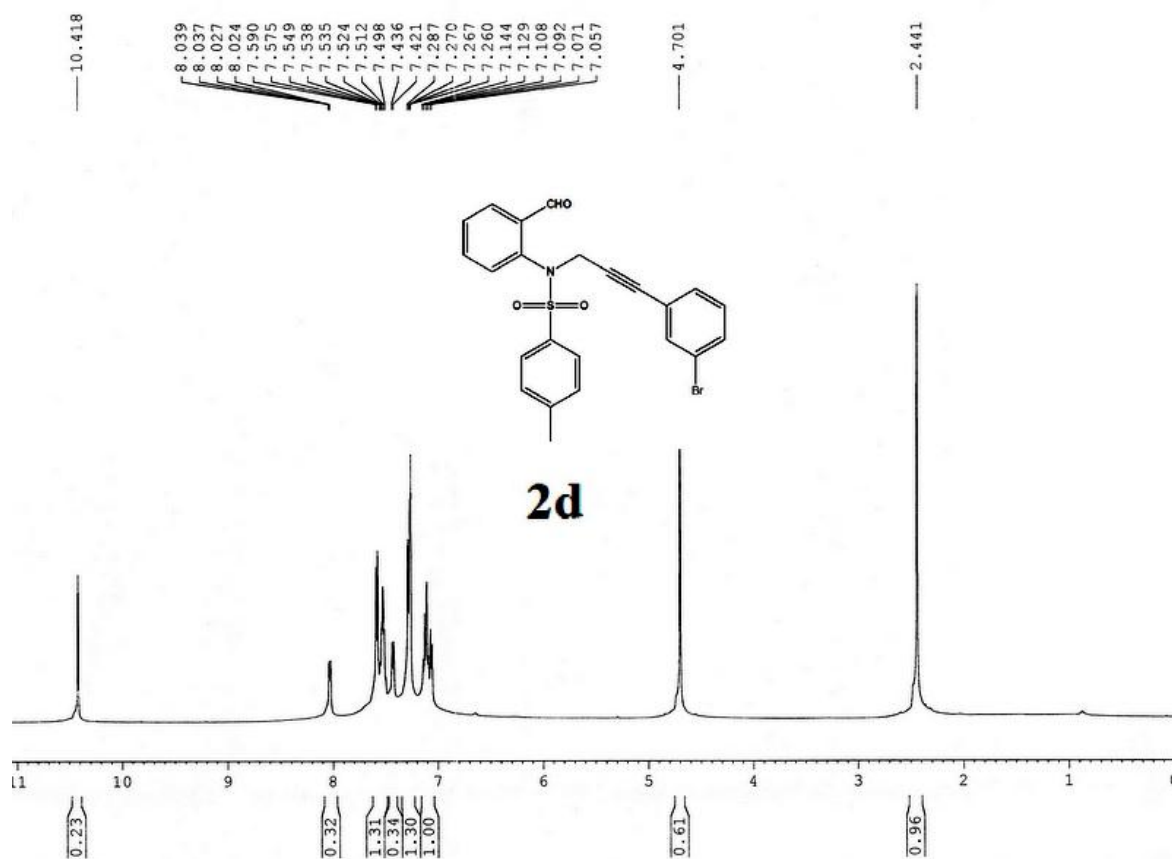

<sup>13</sup>C NMR of compound **2d**

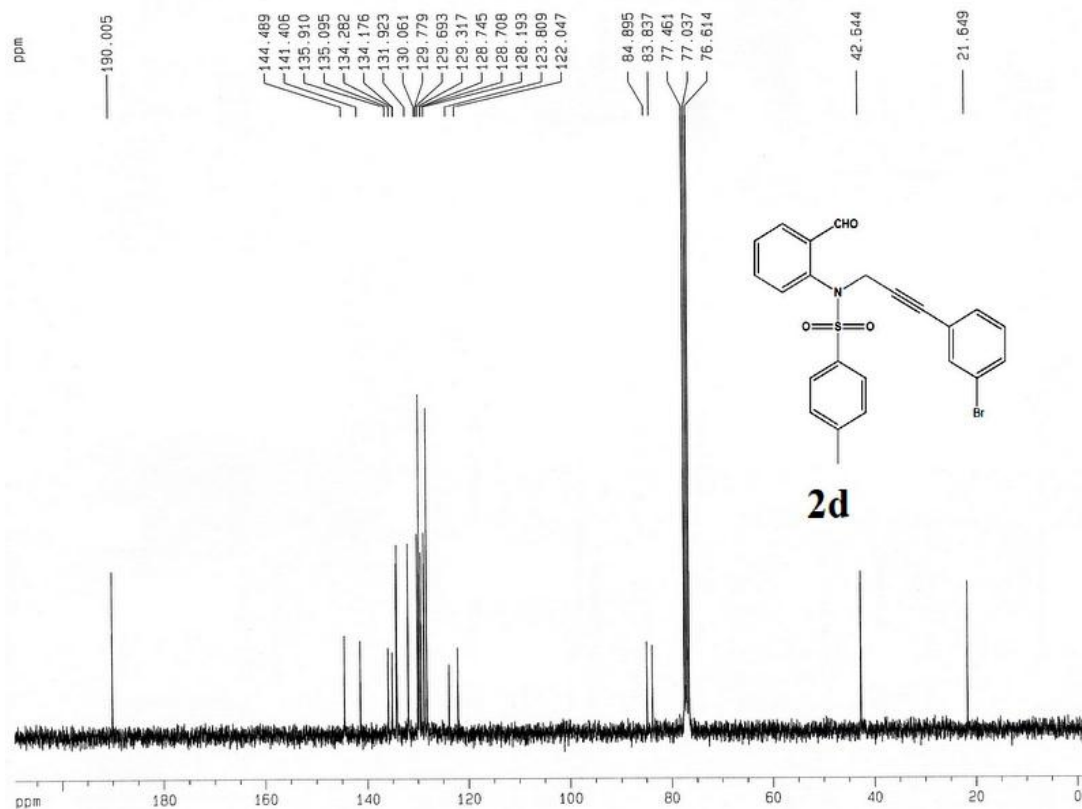

<sup>1</sup>H NMR of compound **2e**

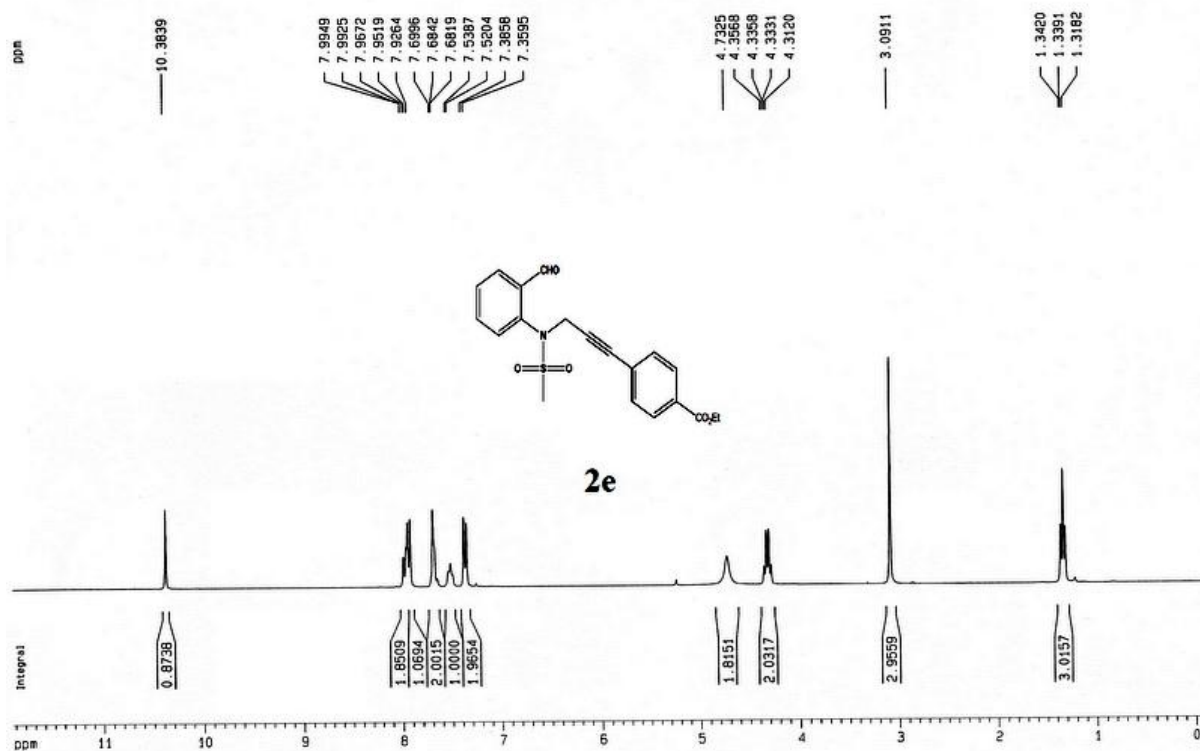

<sup>13</sup>C NMR of compound **2e**

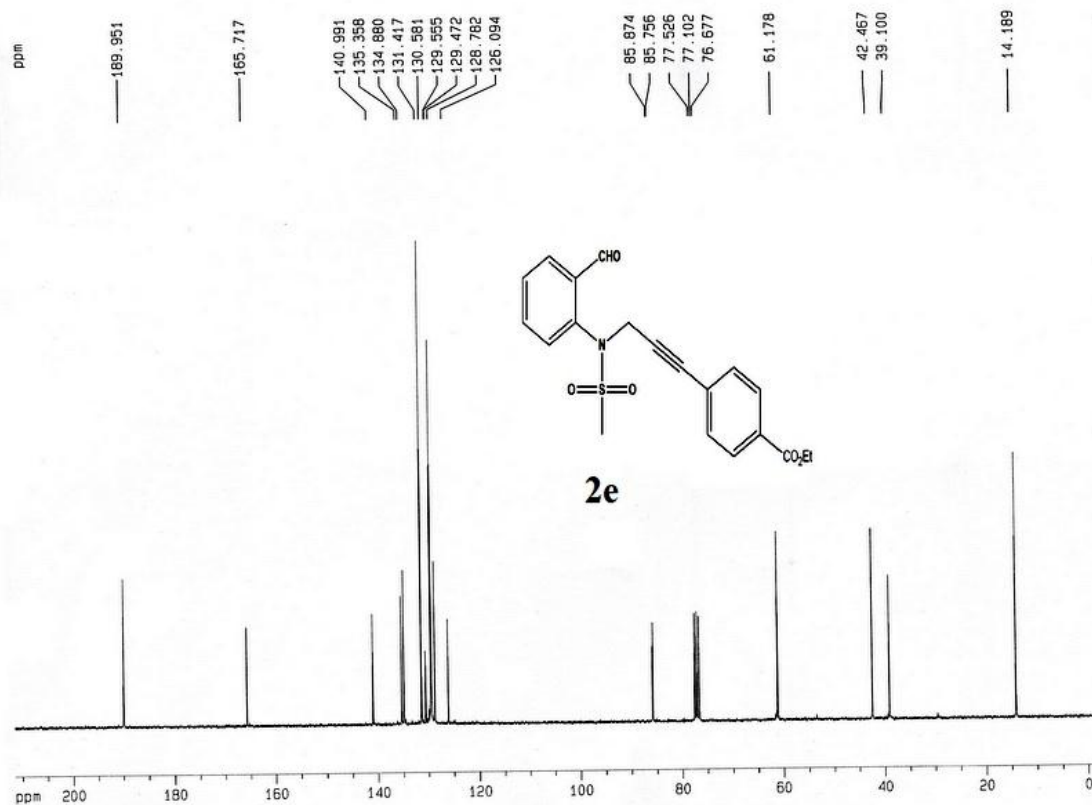

$^1\text{H}$  NMR of compound **2f**

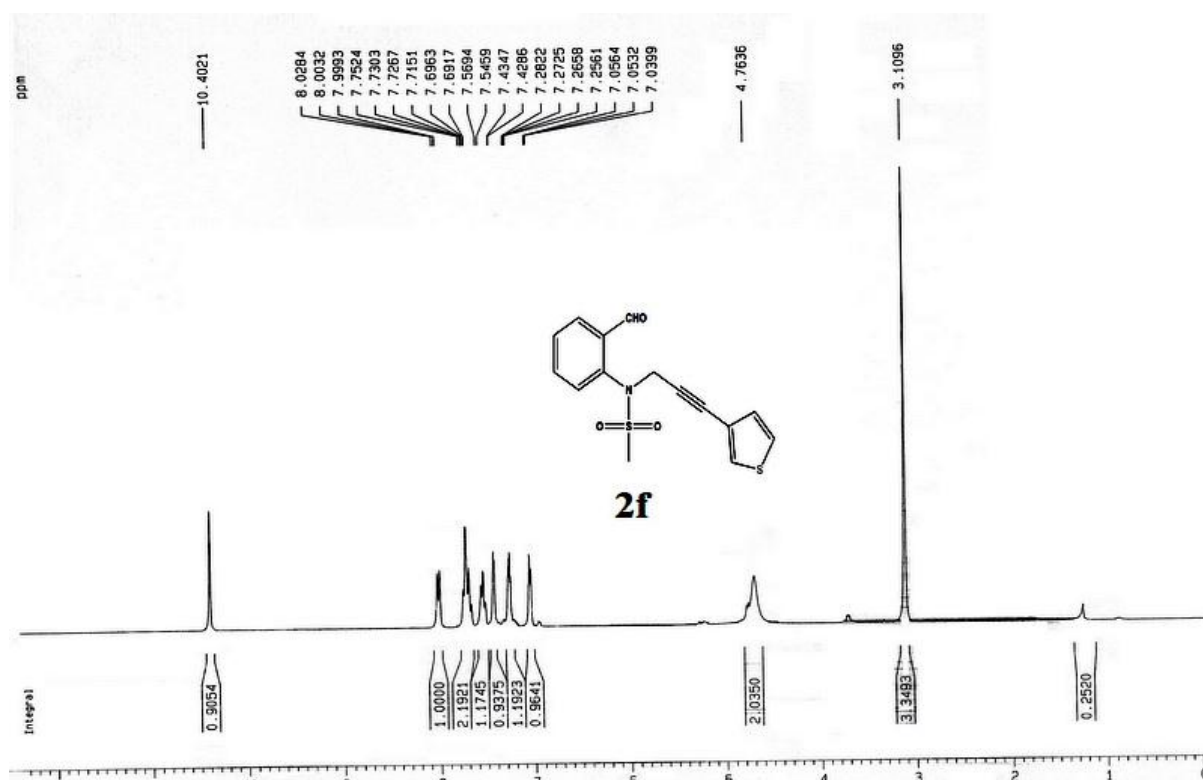

$^{13}\text{C}$  NMR of compound **2f**

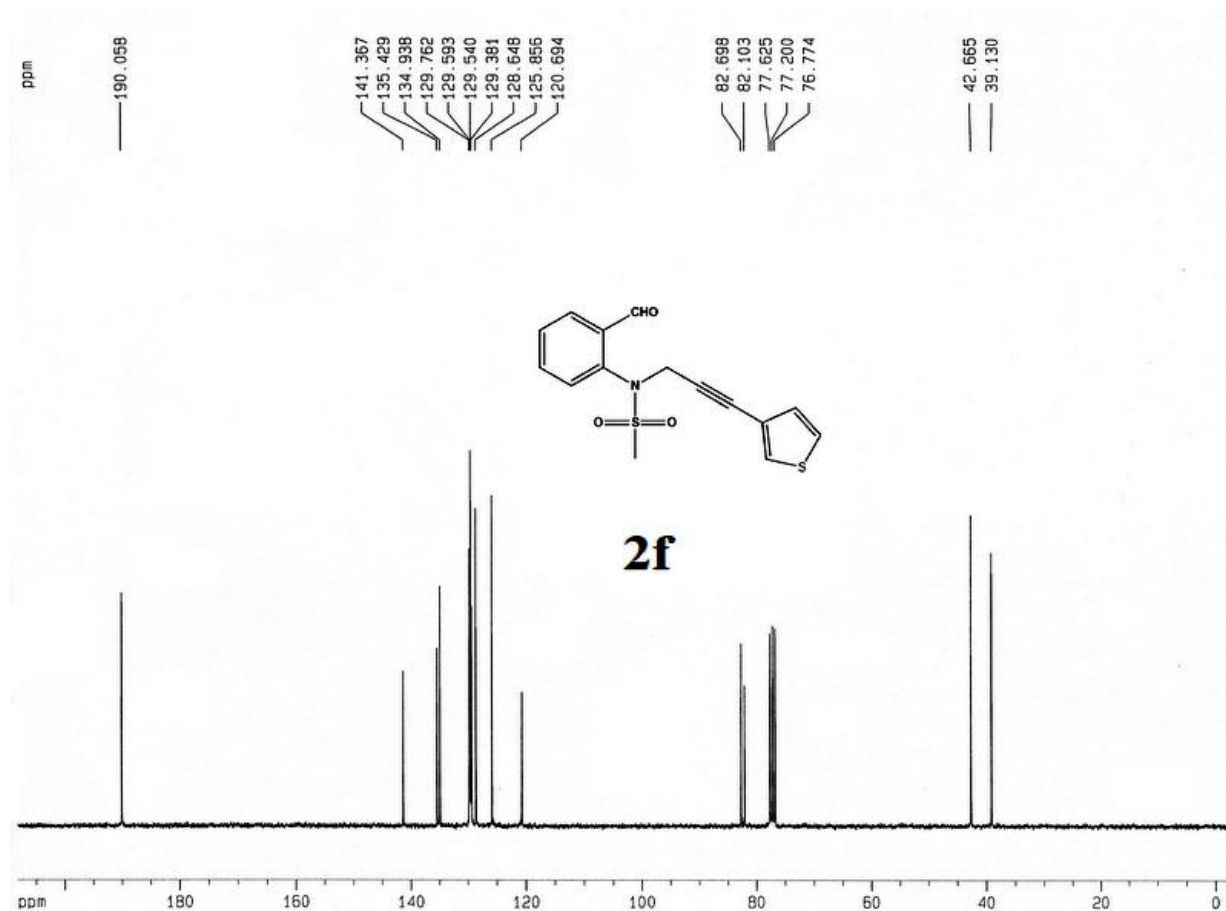



<sup>1</sup>H NMR of compound **2g**

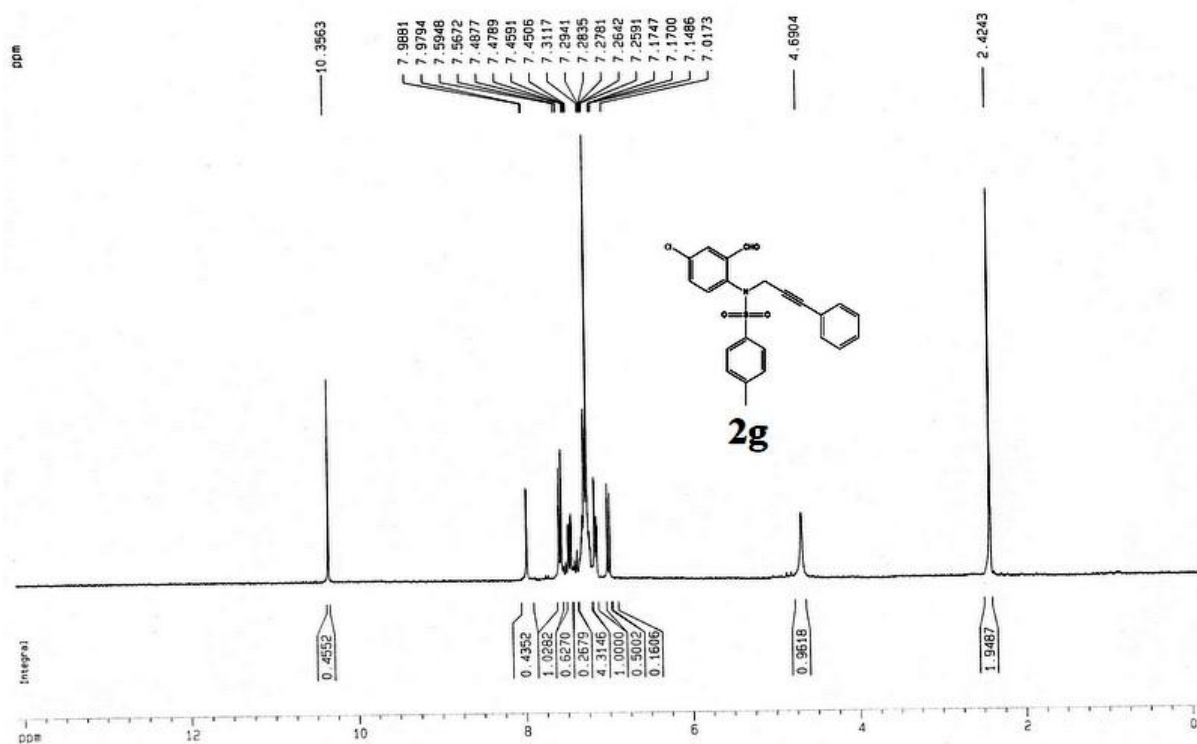

<sup>13</sup>C NMR of compound **2g**

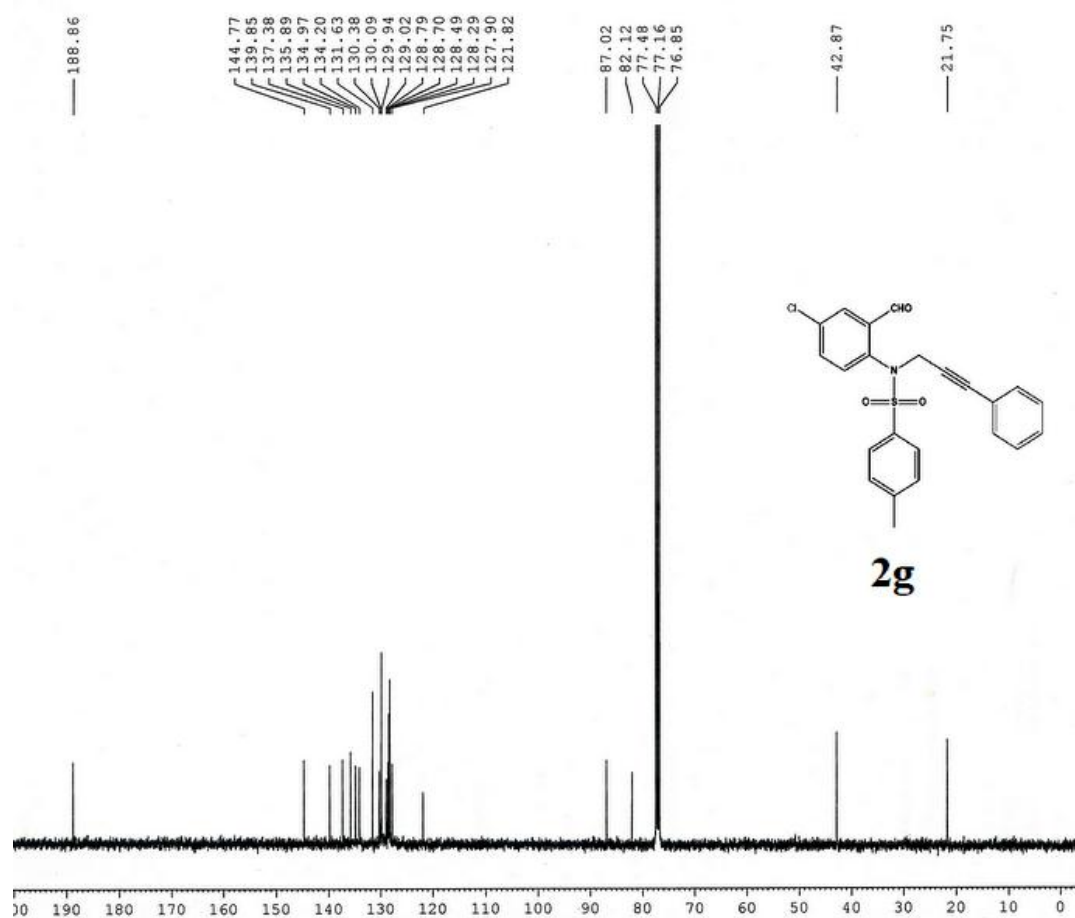



<sup>1</sup>H NMR of compound **2h**

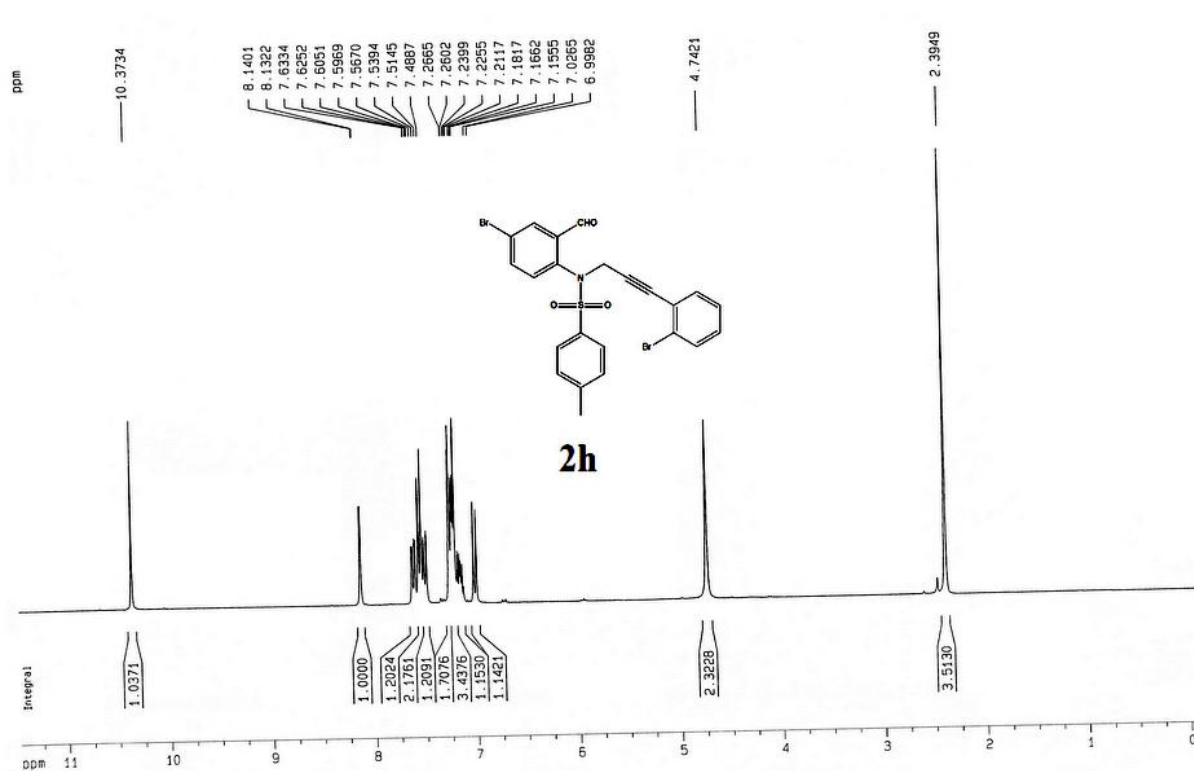

<sup>13</sup>C NMR of compound **2h**

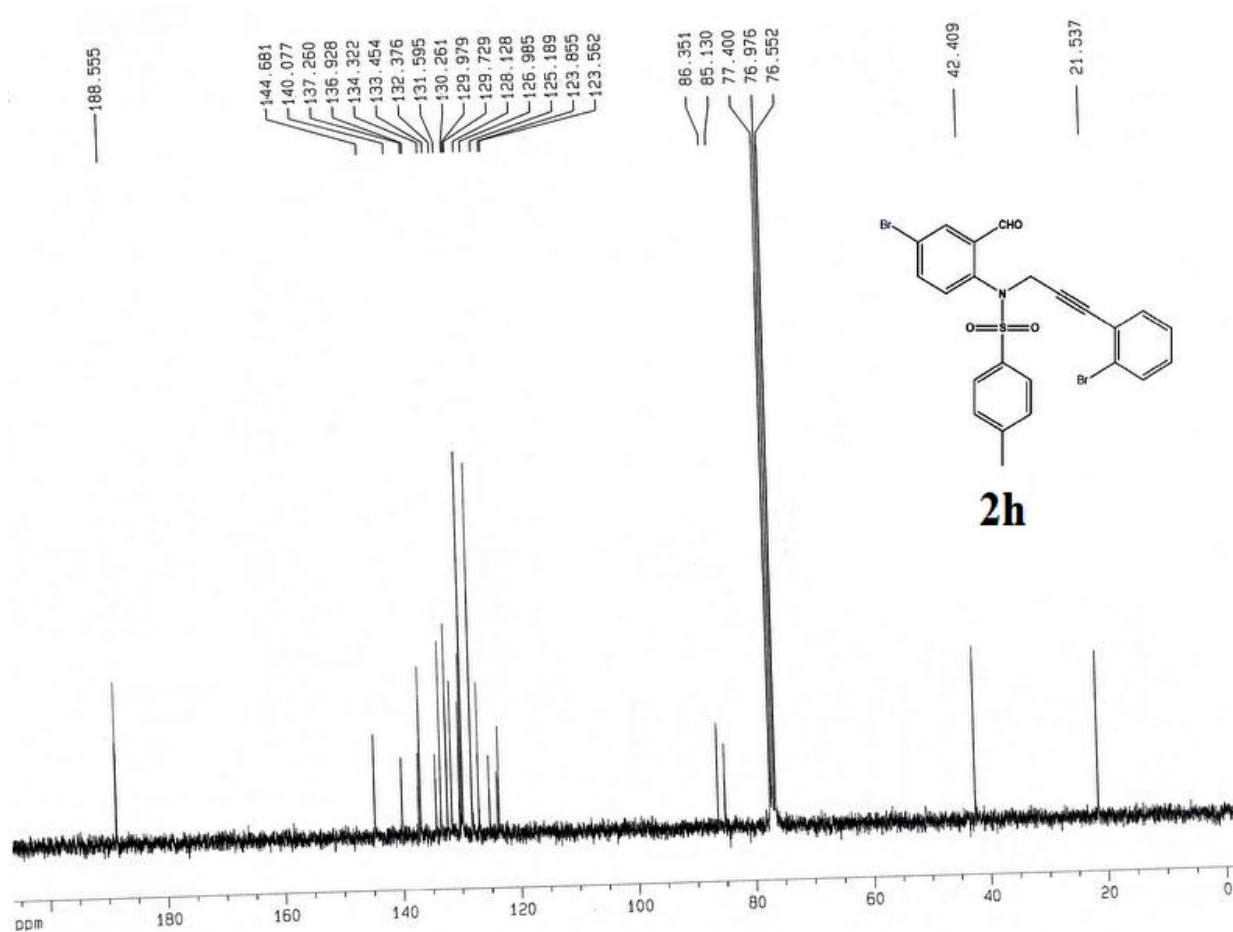

$^1\text{H}$  NMR of compound **2i**

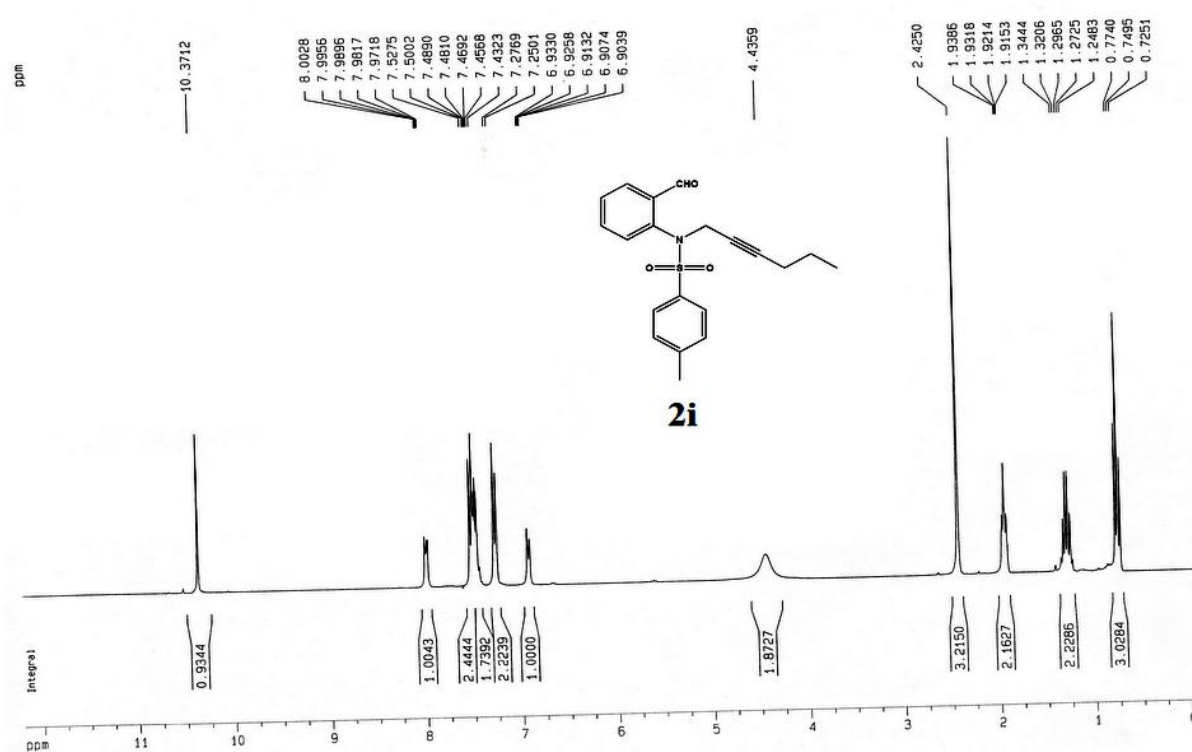

$^{13}\text{C}$  NMR of compound **2i**

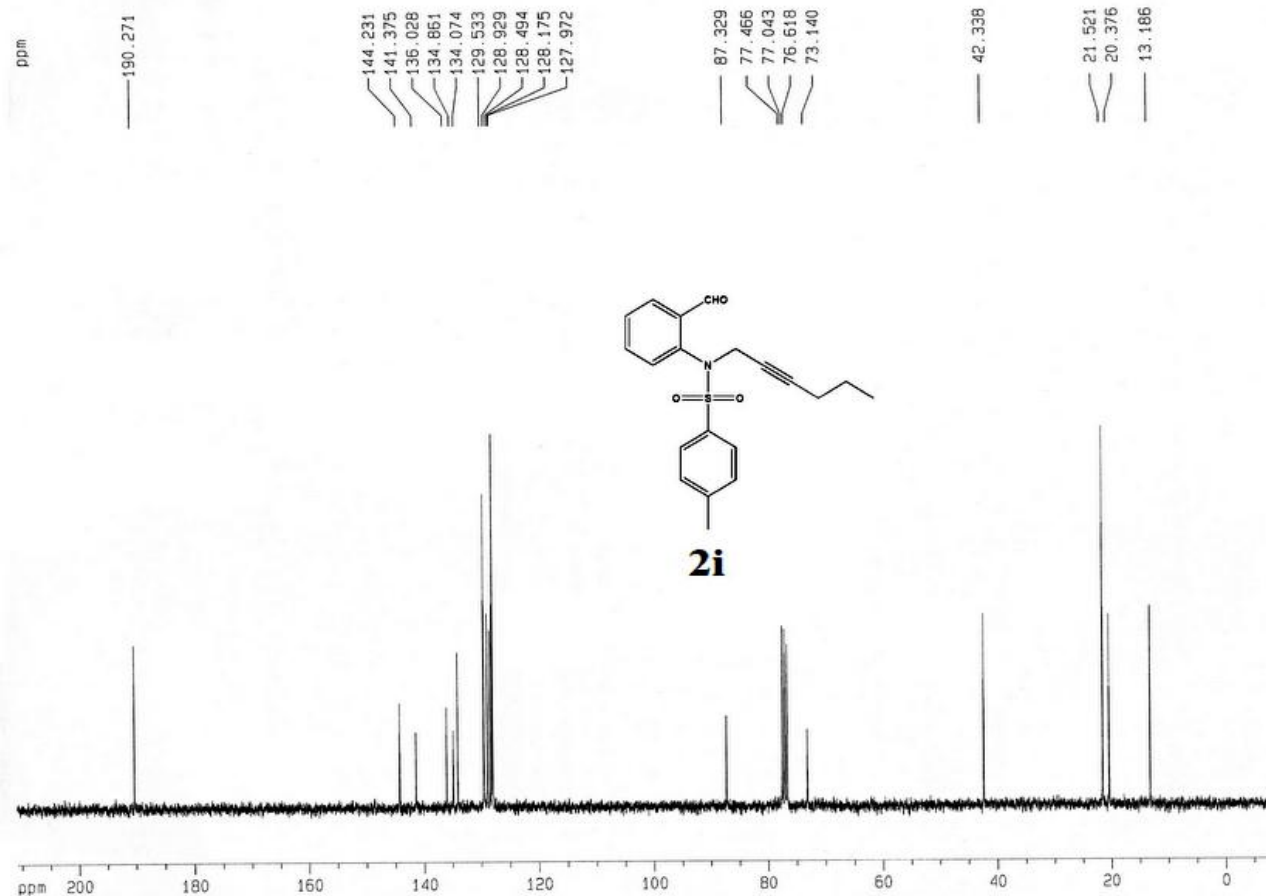

$^1\text{H}$  NMR of compound **2j**

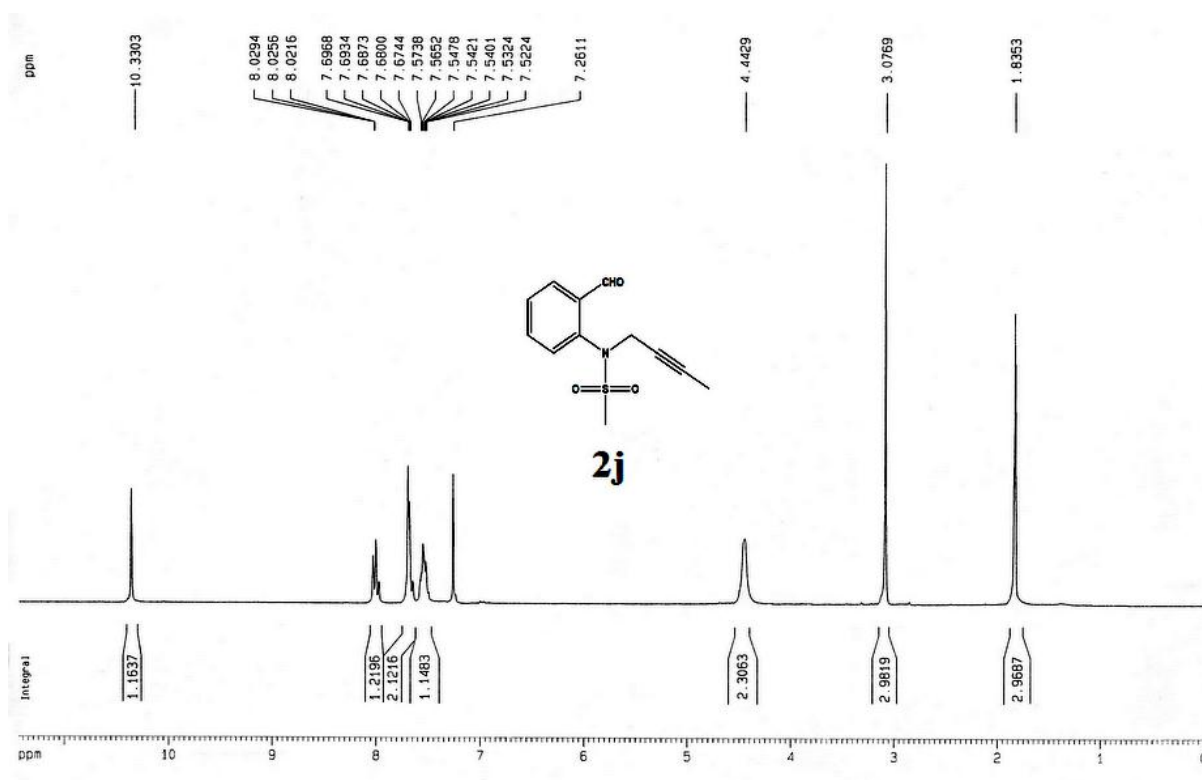

$^{13}\text{C}$  NMR of compound **2j**

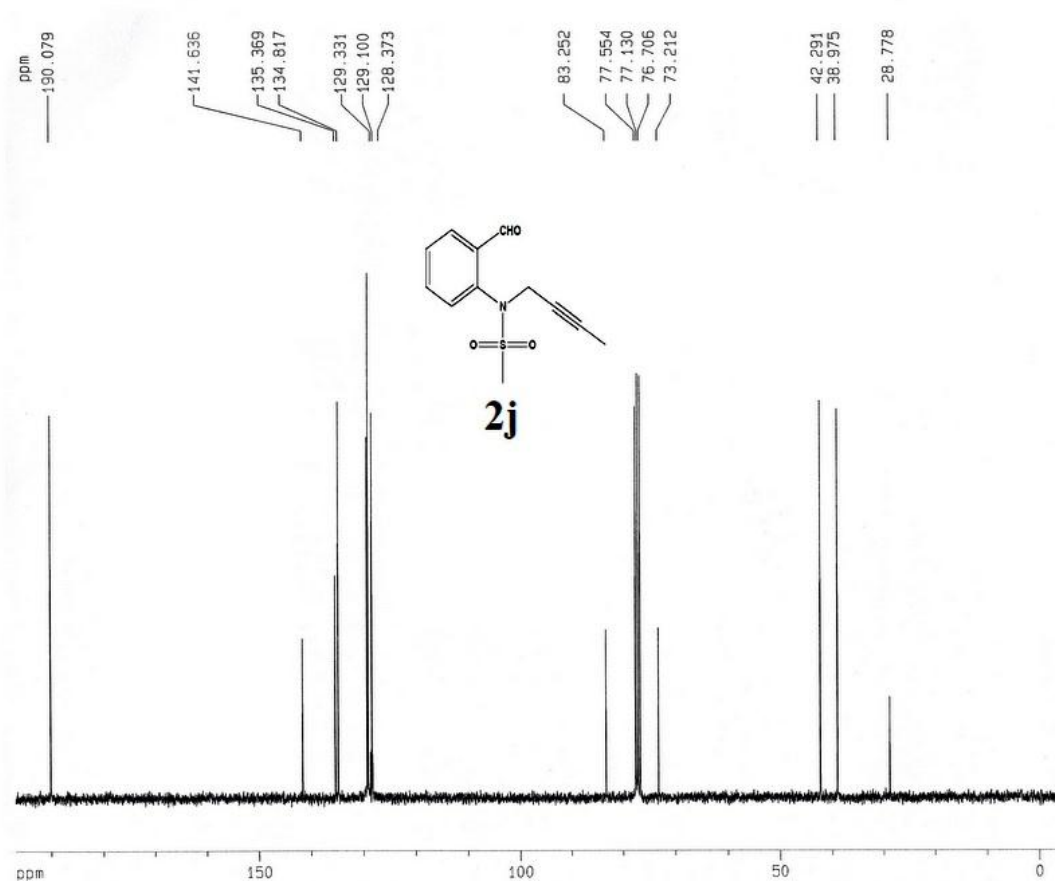

<sup>1</sup>H NMR of compound **4a**

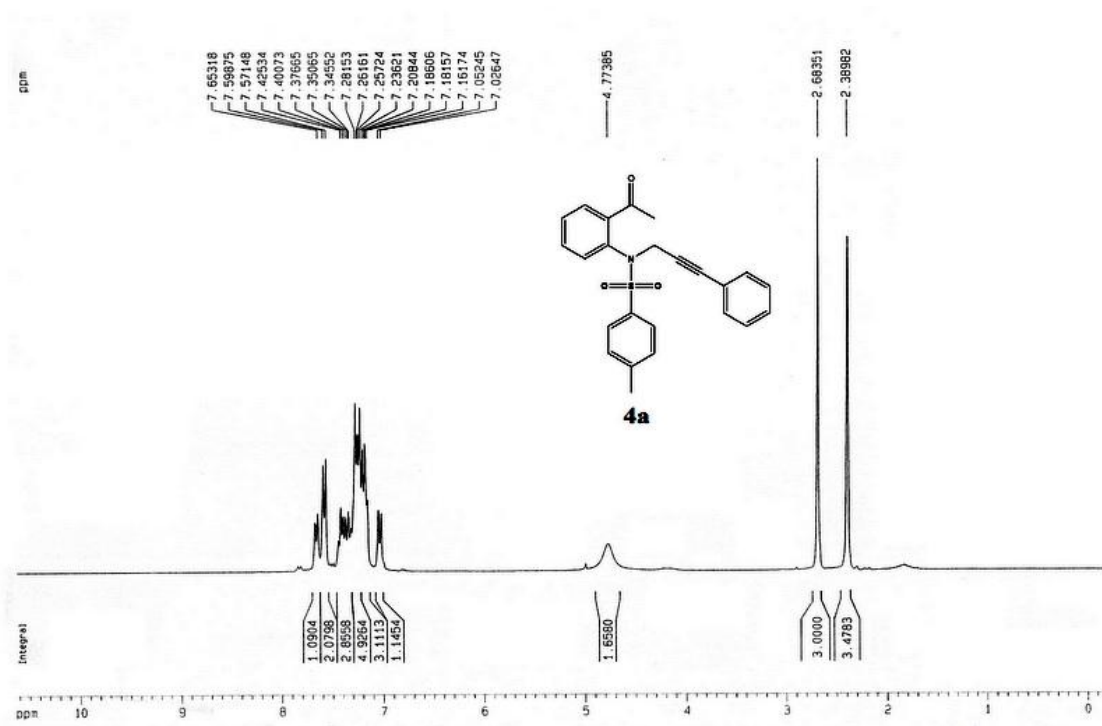

<sup>13</sup>C NMR of compound **4a**

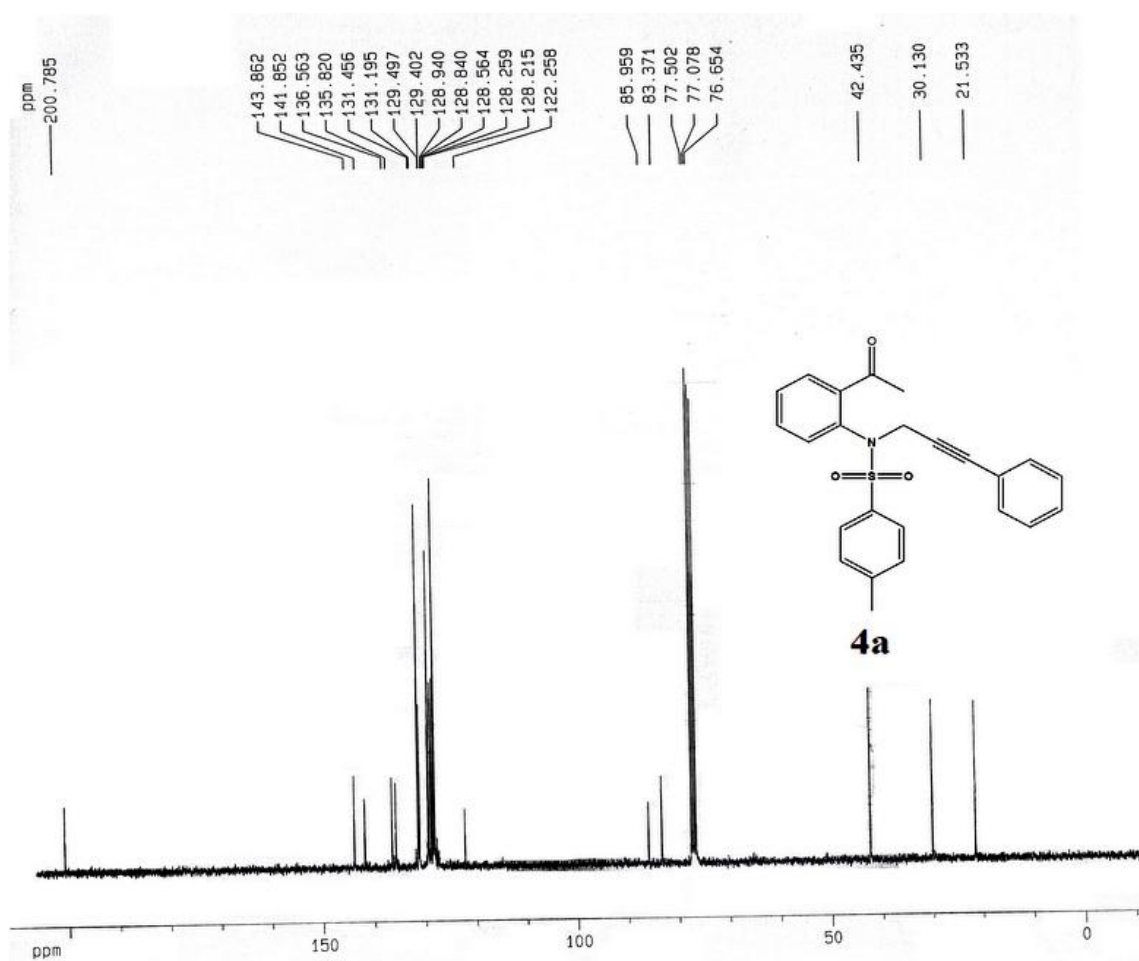

<sup>1</sup>H NMR of compound **4b**

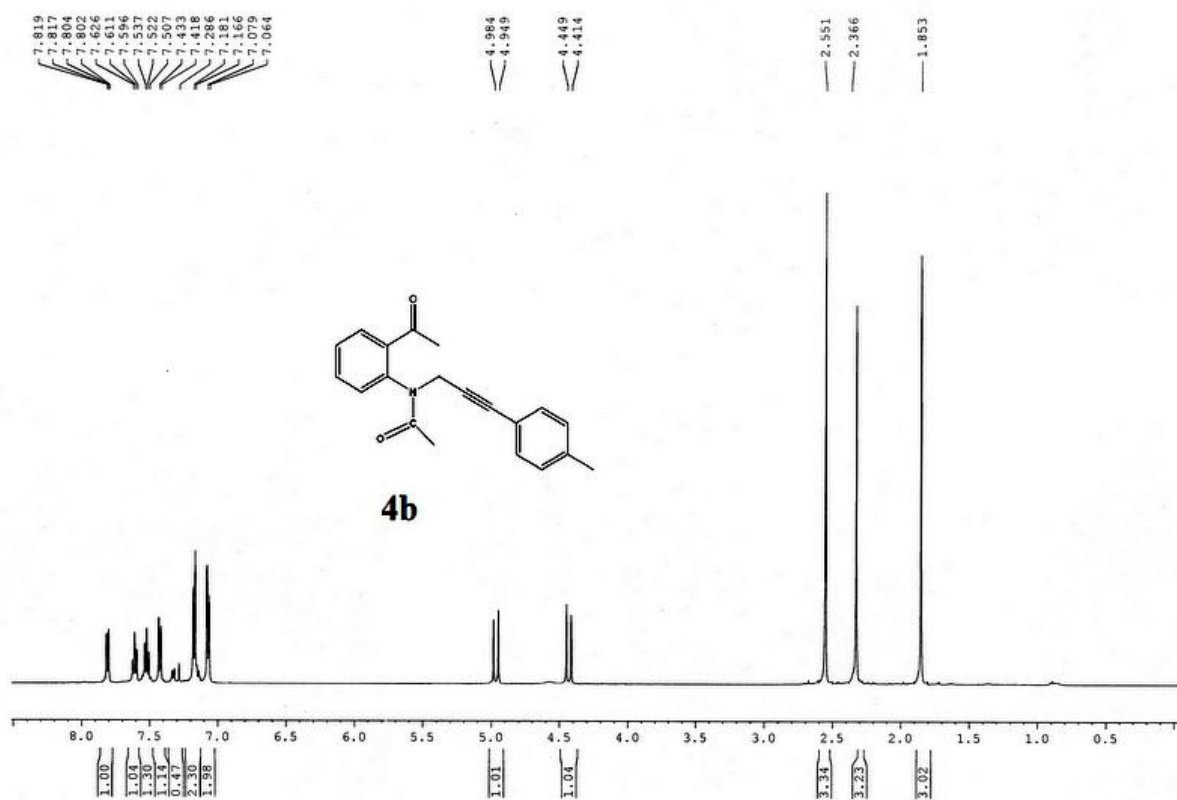

<sup>13</sup>C NMR of compound **4b**

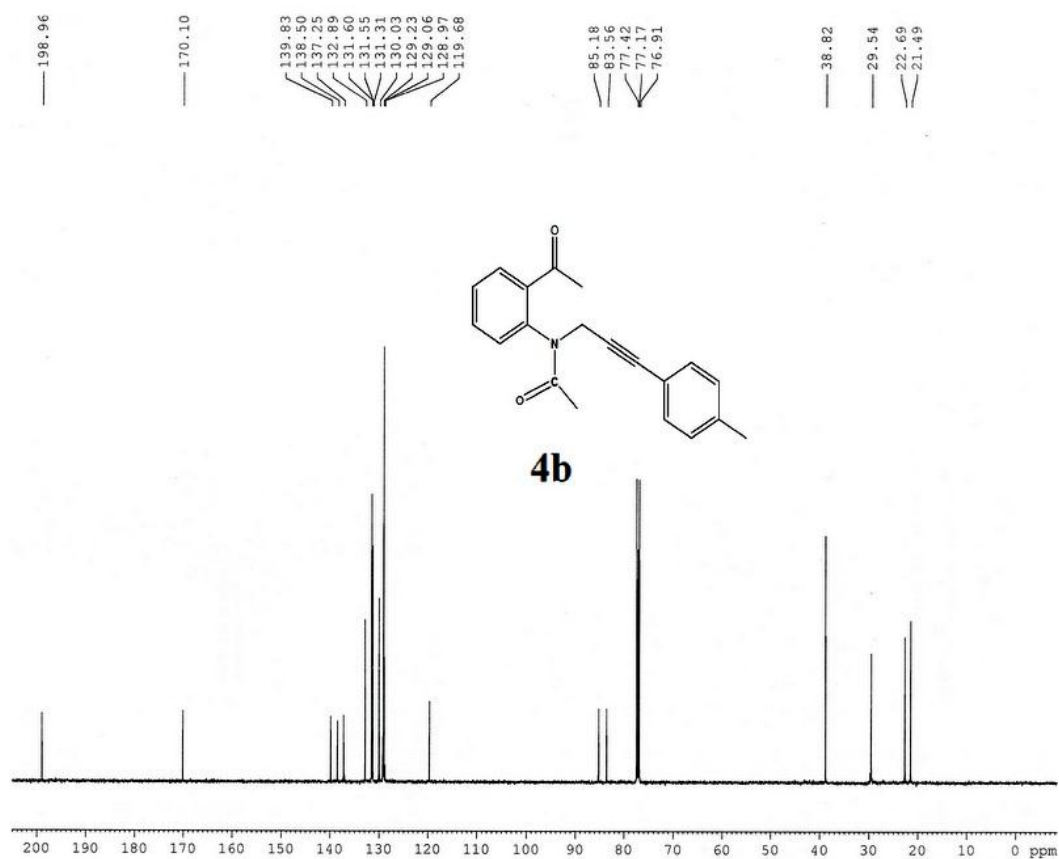

$^1\text{H}$  NMR of compound **3a**

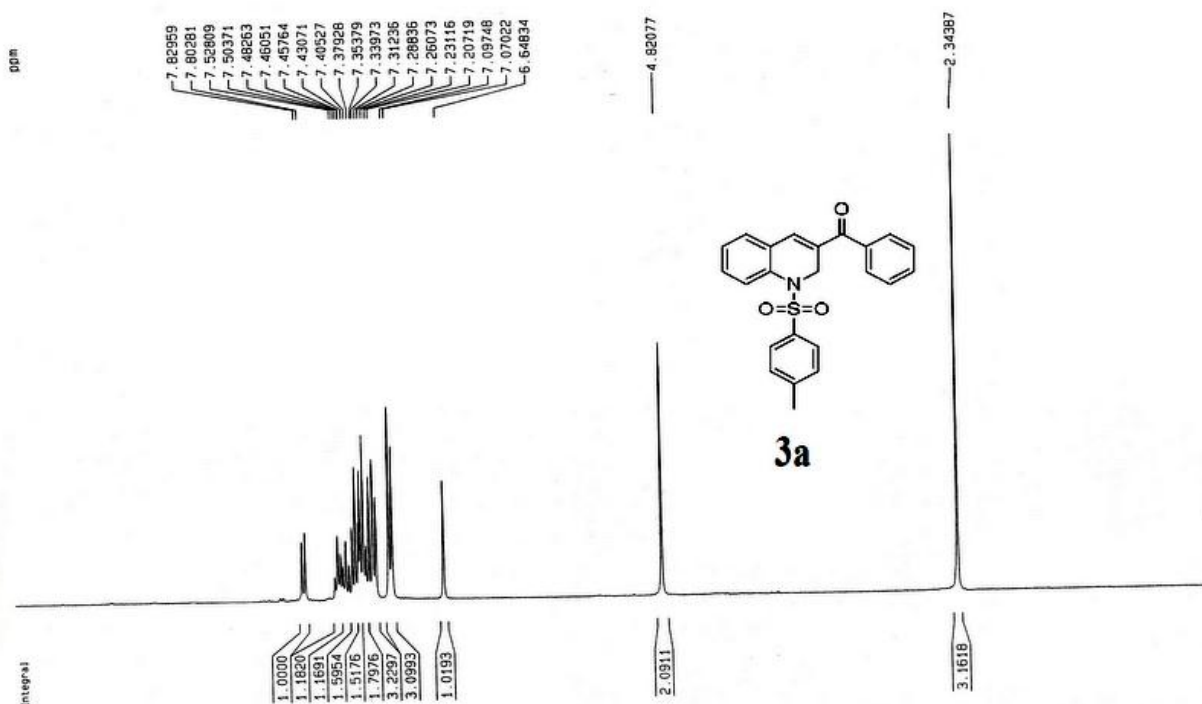

$^{13}\text{C}$  NMR of compound **3a**

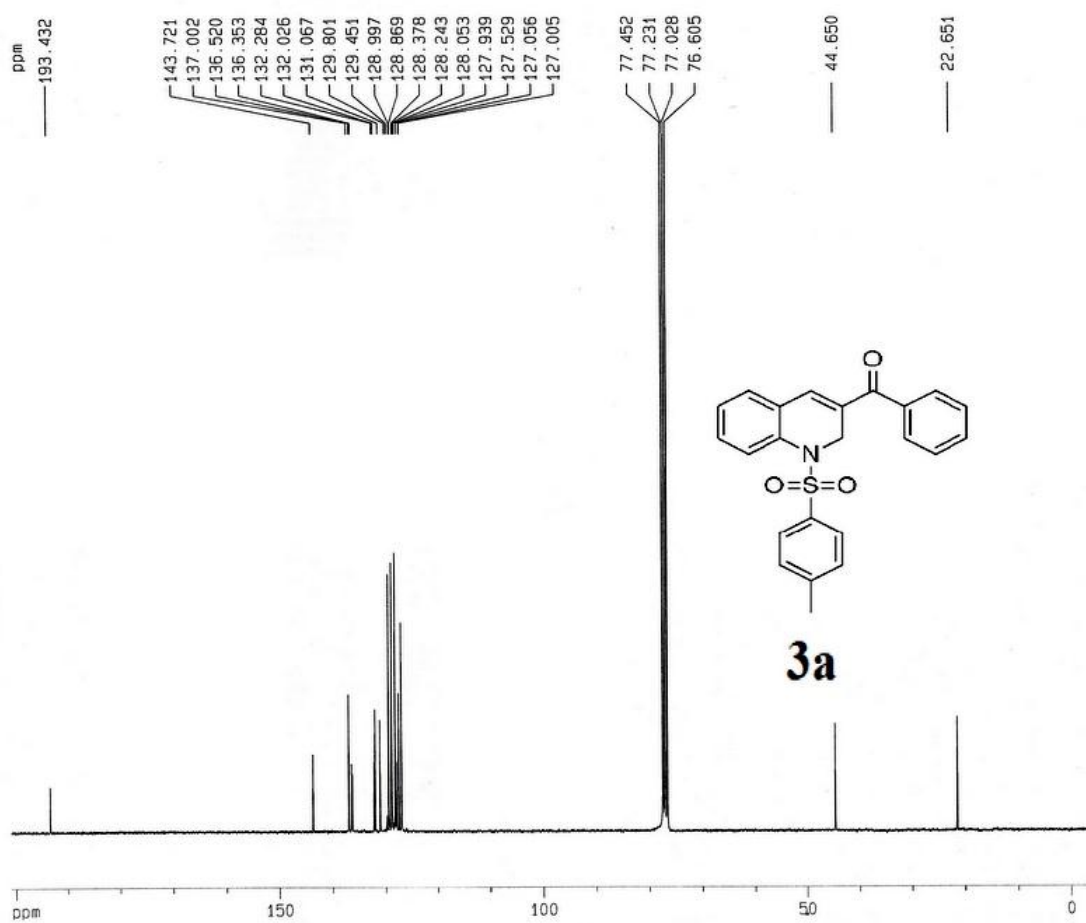

<sup>1</sup>H NMR of compound **3b**

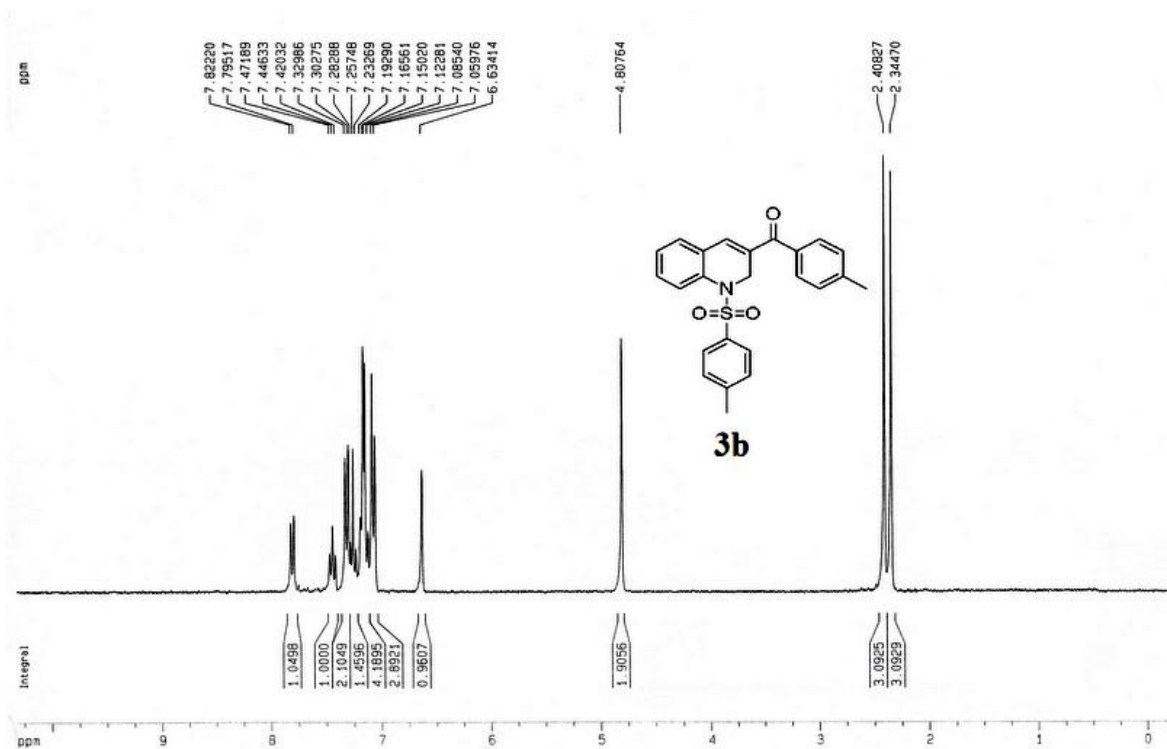

<sup>13</sup>C NMR of compound **3b**

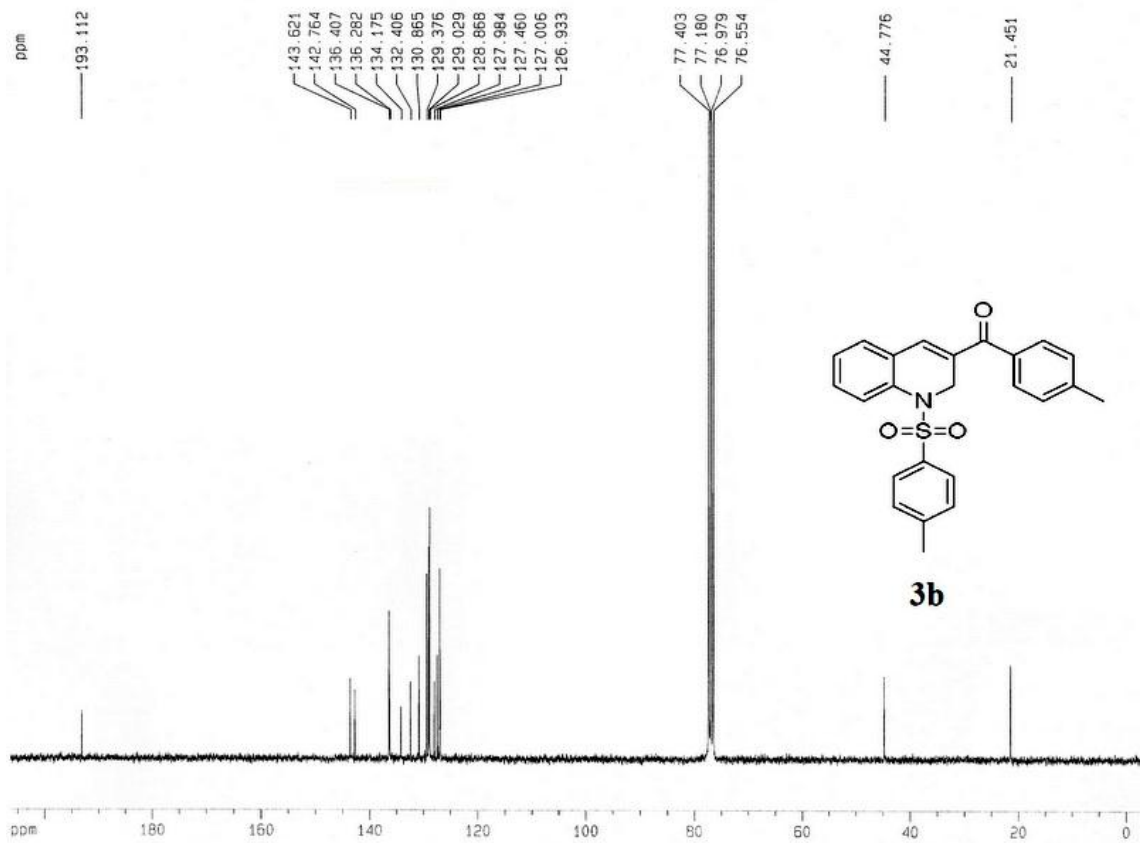



$^1\text{H}$  NMR of compound **3c**

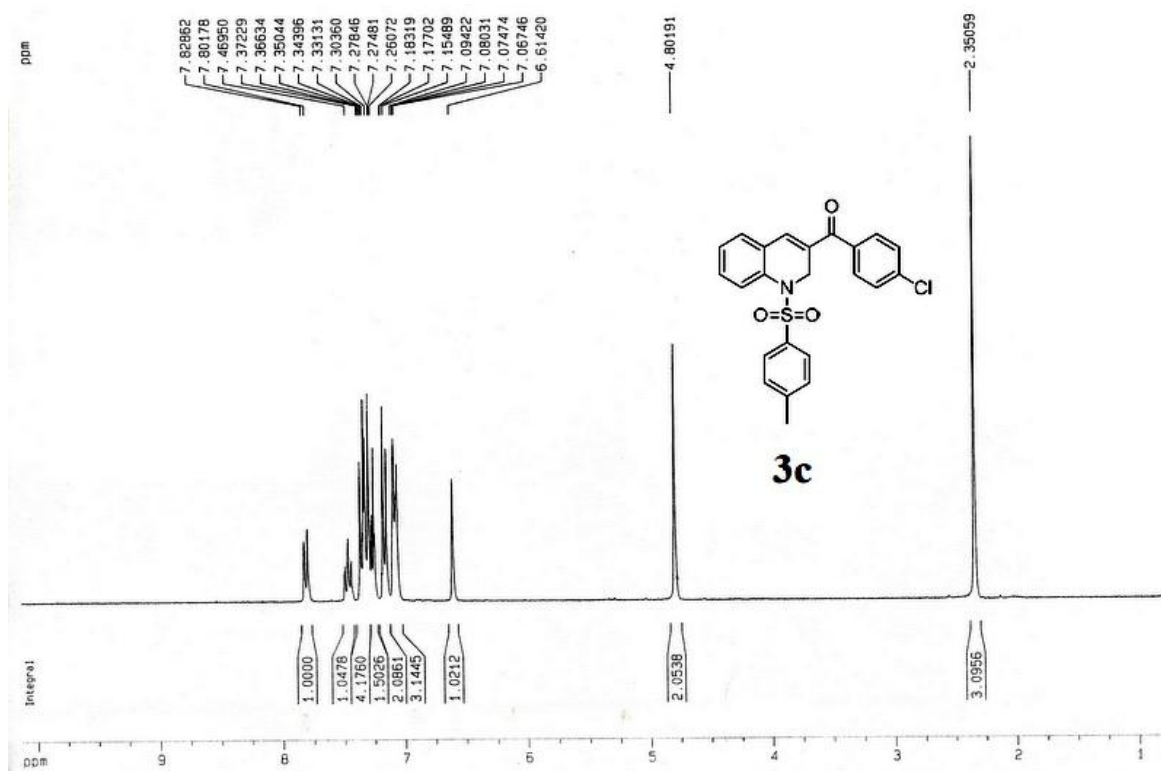

$^{13}\text{C}$  NMR of compound **3c**

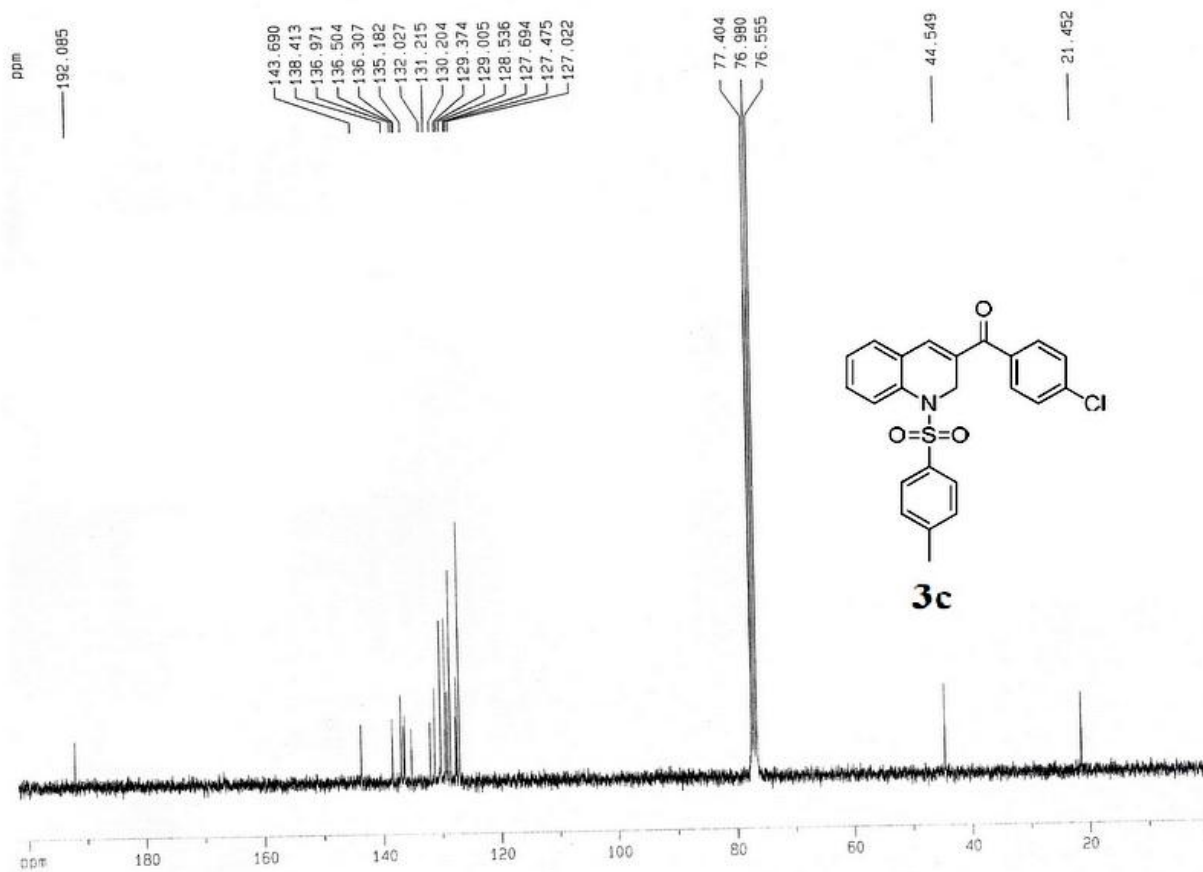

<sup>1</sup>H NMR of compound **3d**

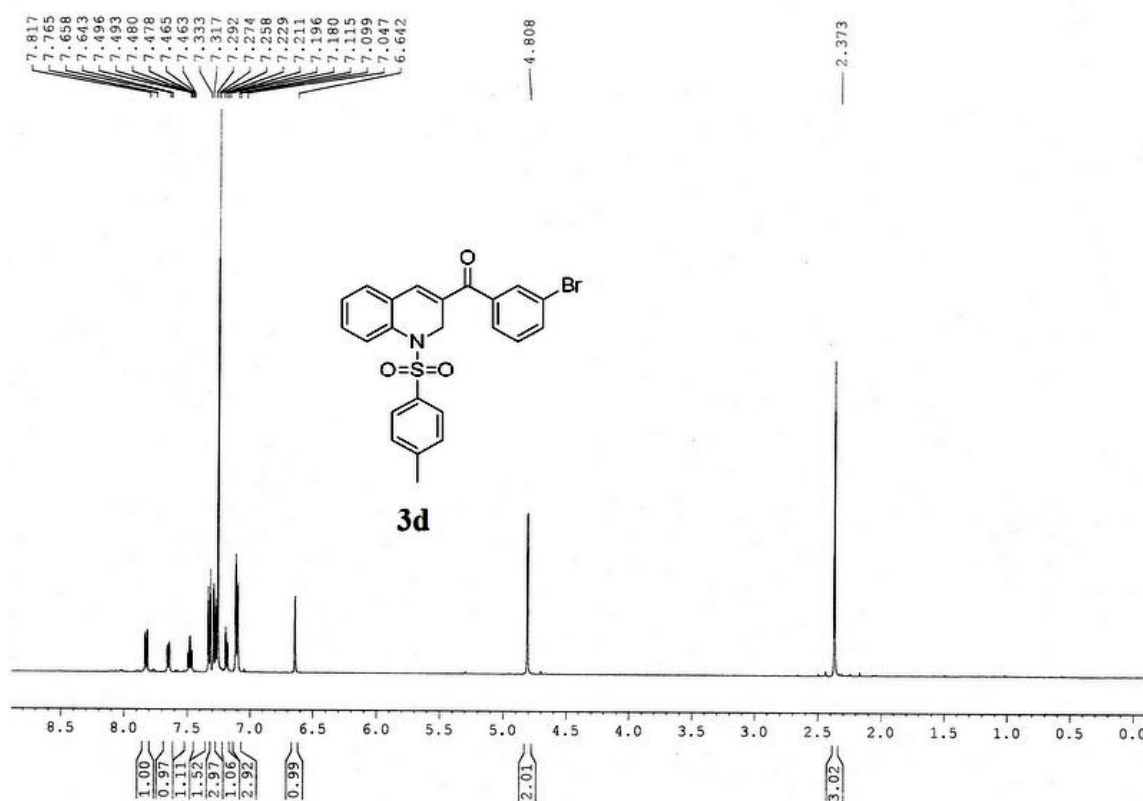

<sup>13</sup>C NMR of compound **3d**

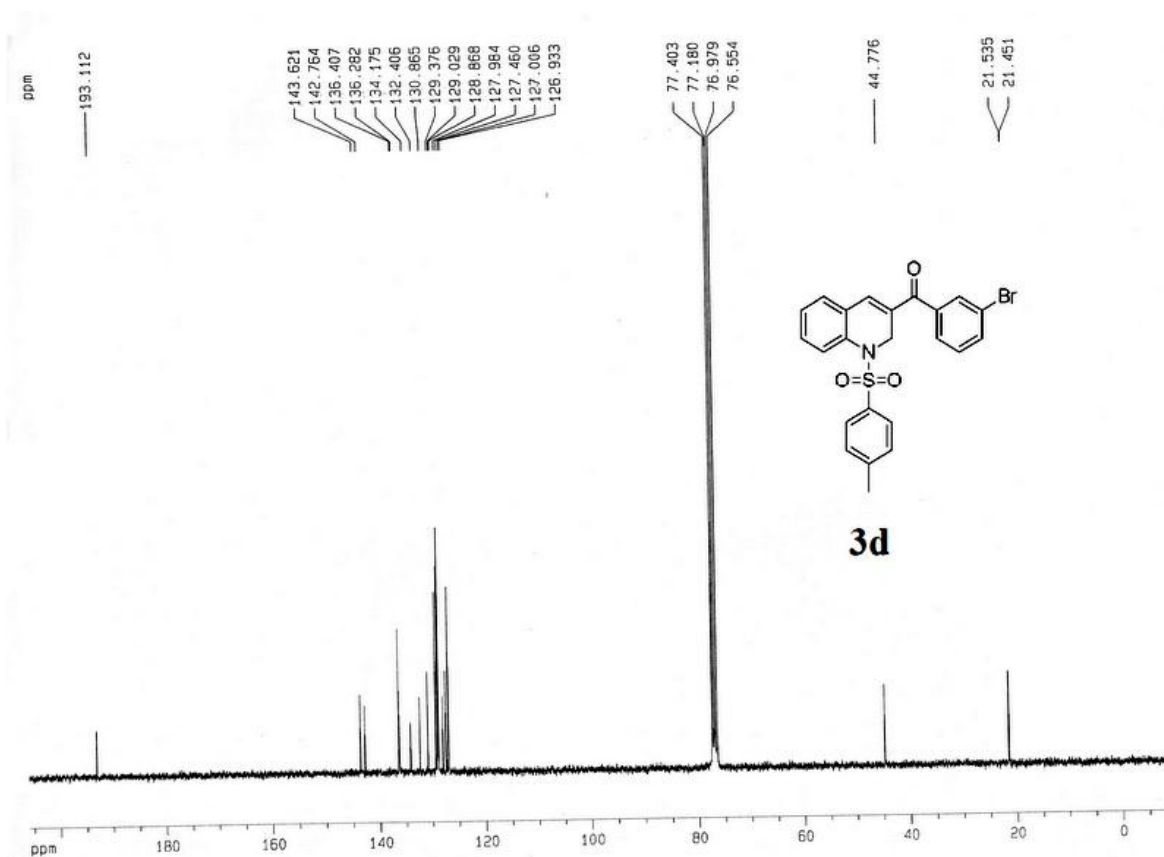

<sup>1</sup>H NMR of compound **3e**

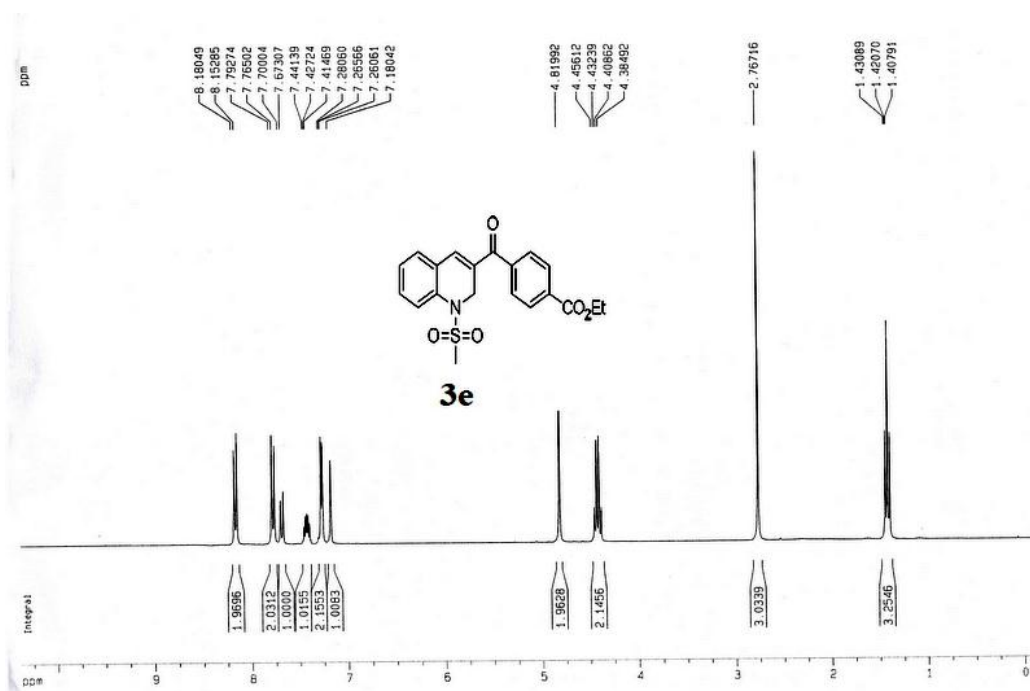

<sup>13</sup>C NMR of compound **3e**

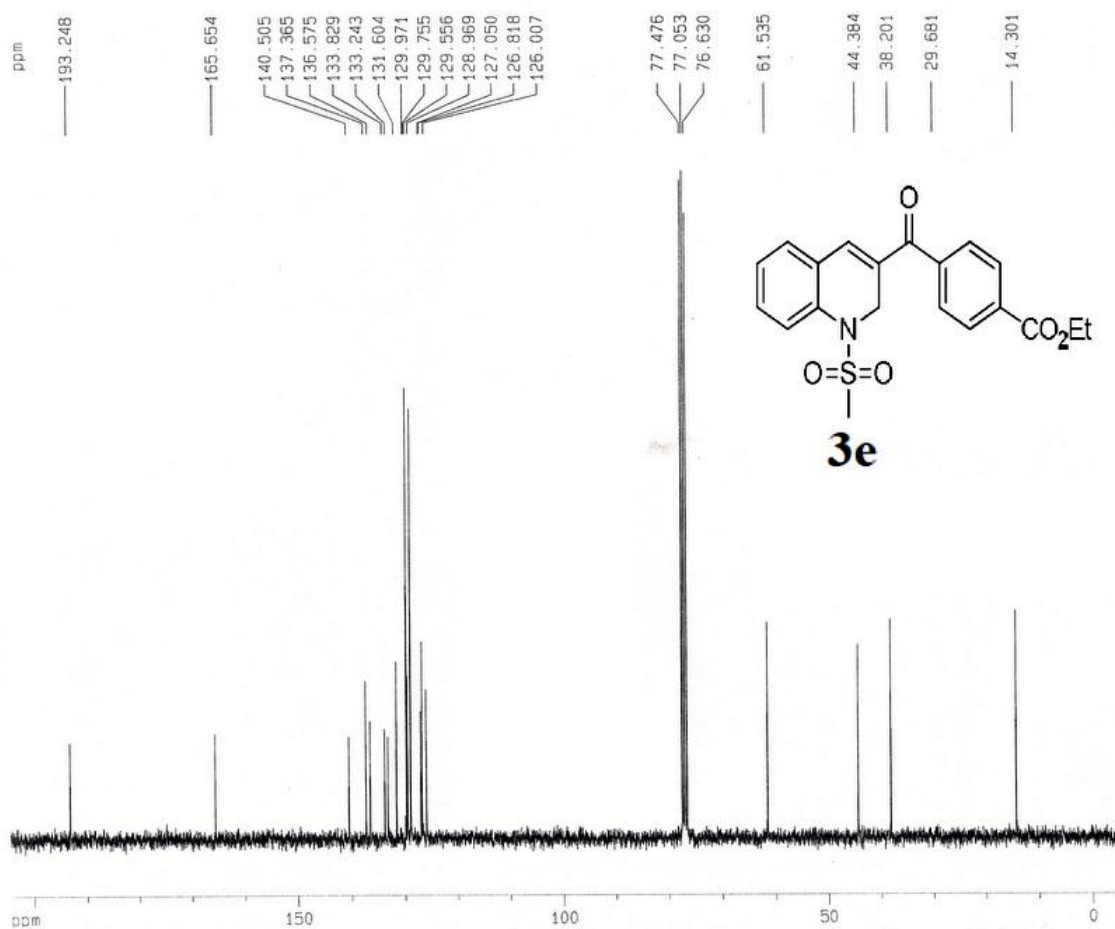

$^1\text{H}$  NMR of compound **3f**

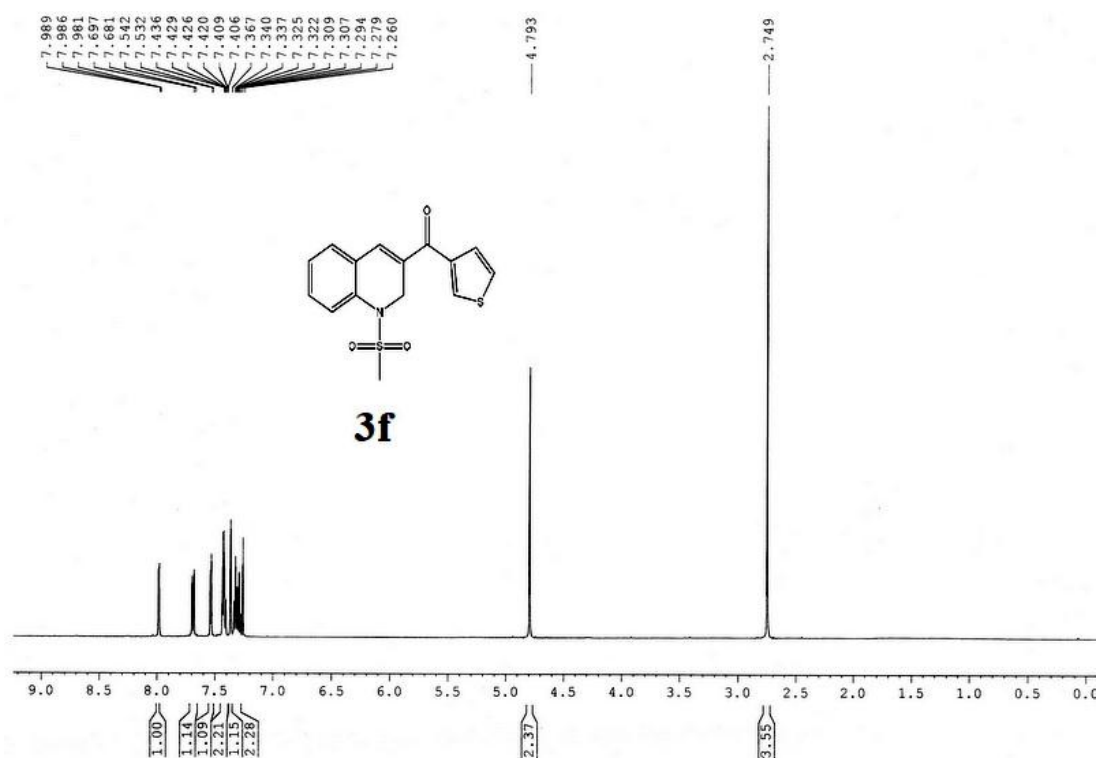

$^{13}\text{C}$  NMR of compound **3f**

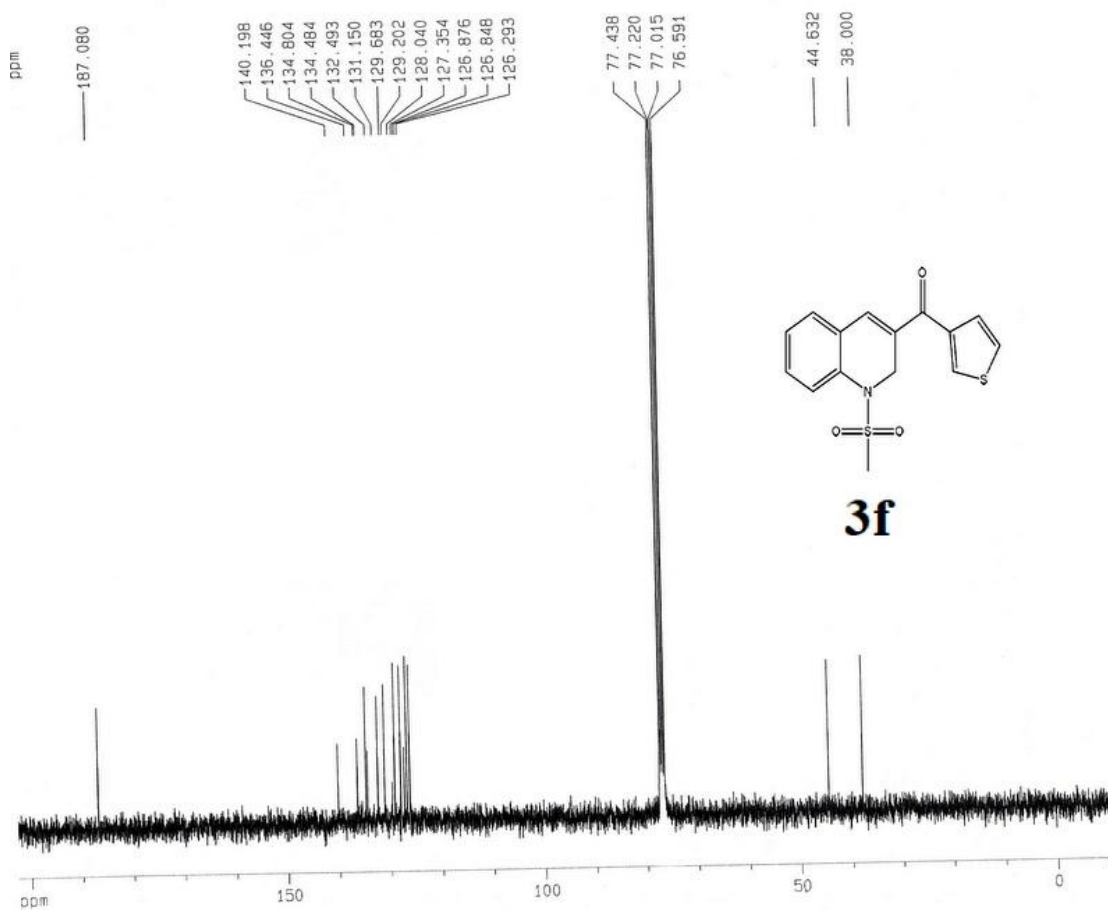

<sup>1</sup>H NMR of compound **3g**

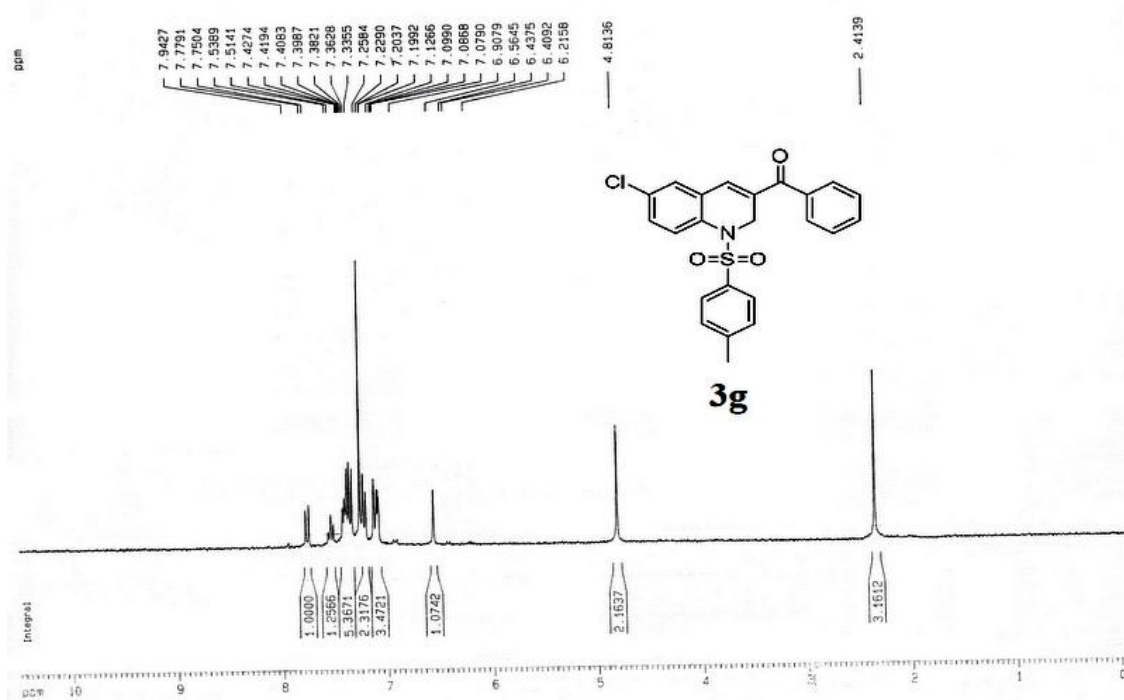

<sup>13</sup>C NMR of compound **3g**

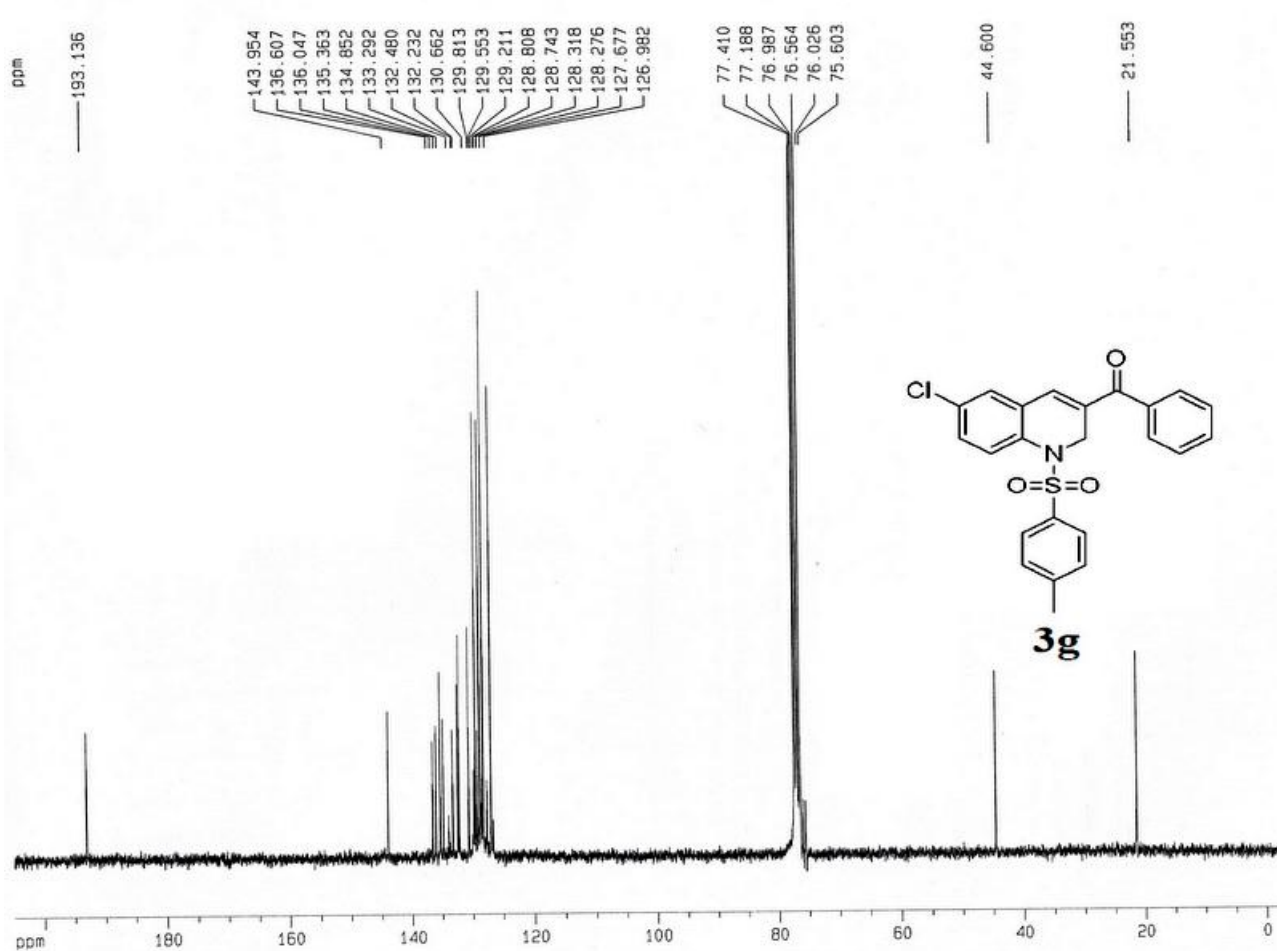

<sup>1</sup>H NMR of compound **3h**

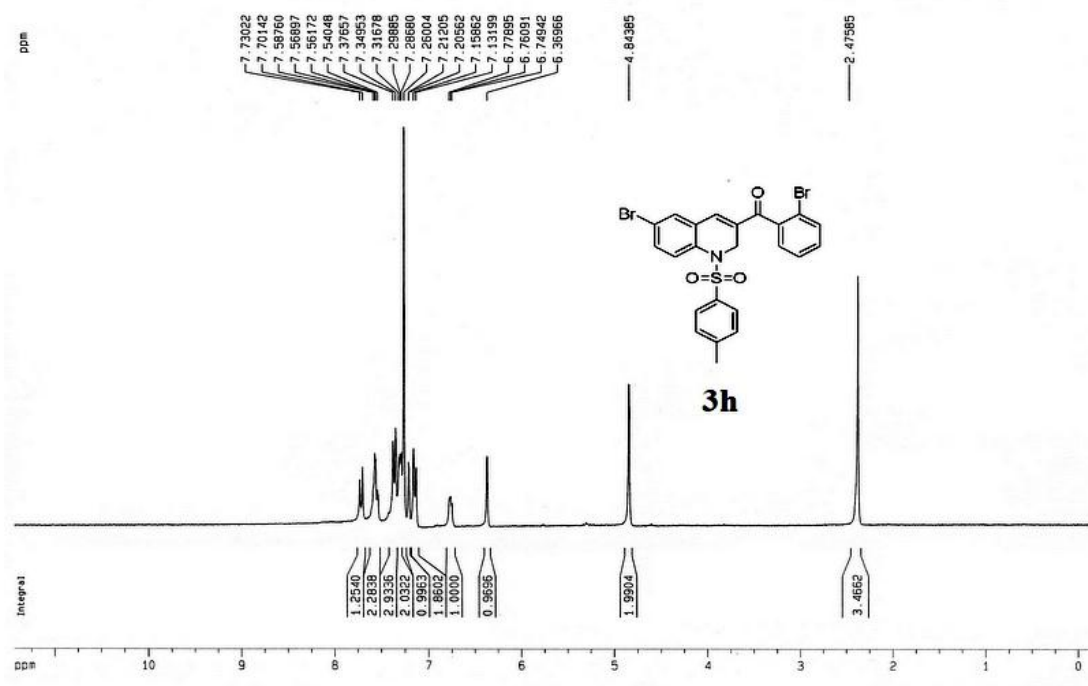

<sup>13</sup>C NMR of compound **3h**

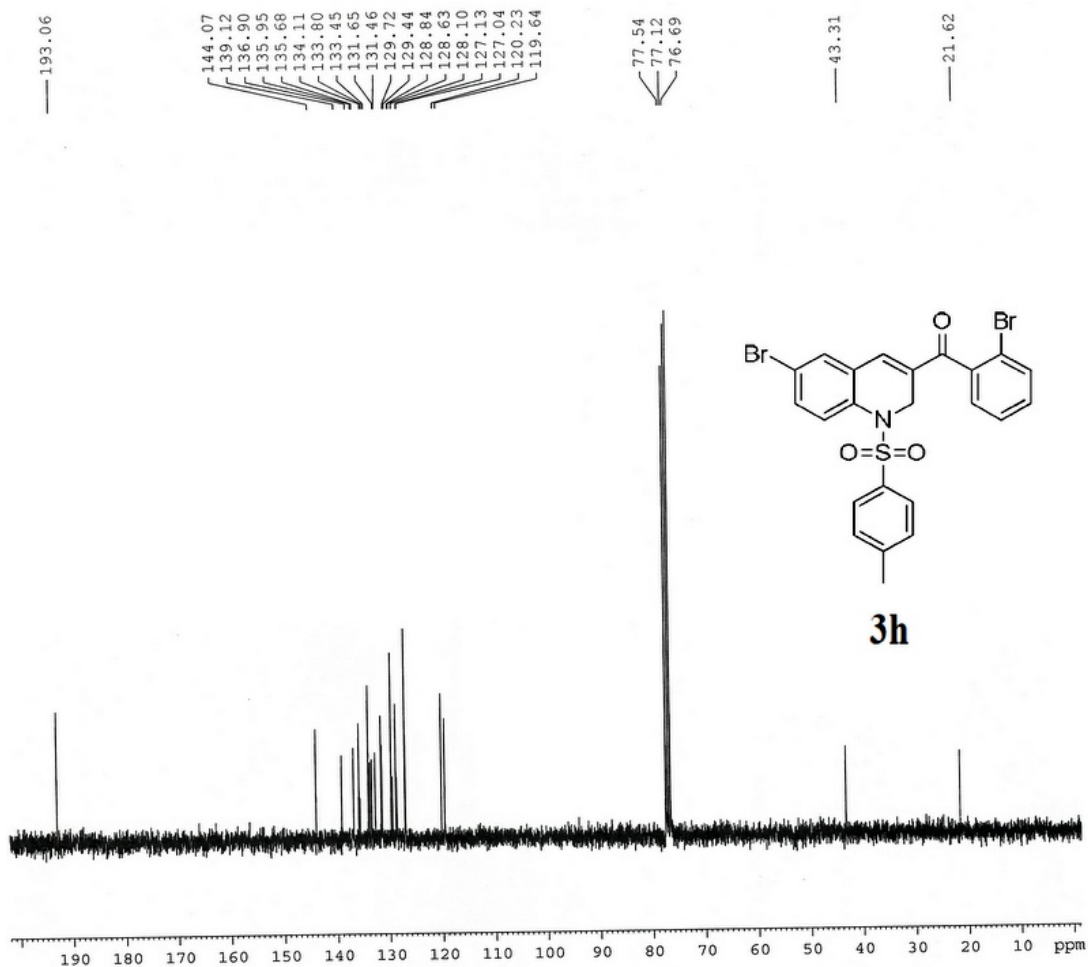

$^1\text{H}$  NMR of compound **3i**

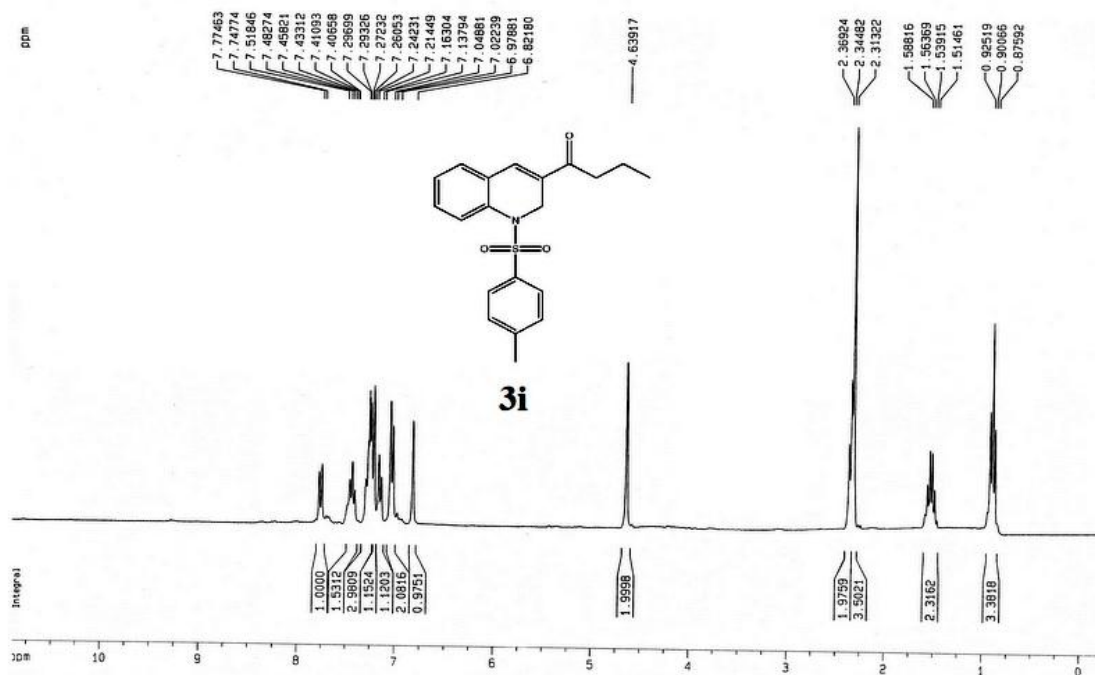

$^{13}\text{C}$  NMR of compound **3i**

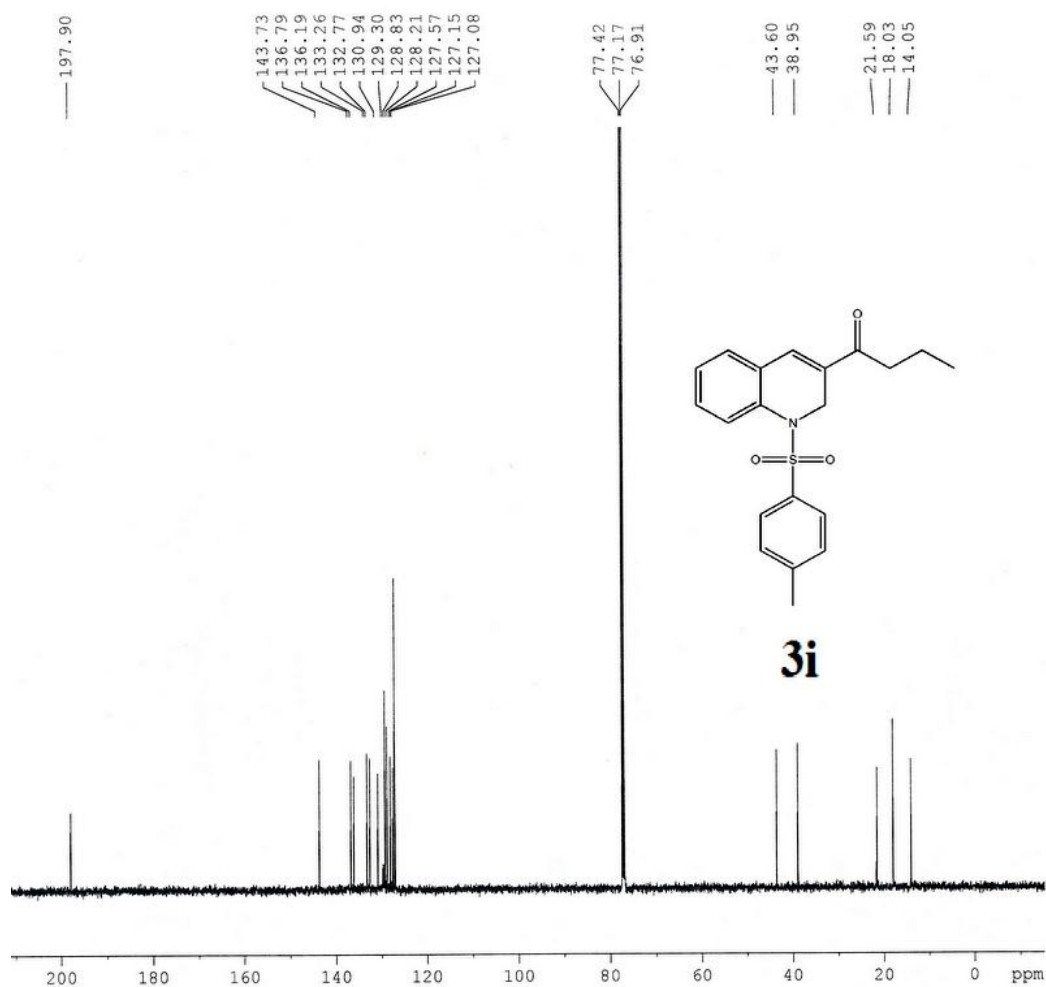



$^1\text{H}$  NMR of compound **3j**

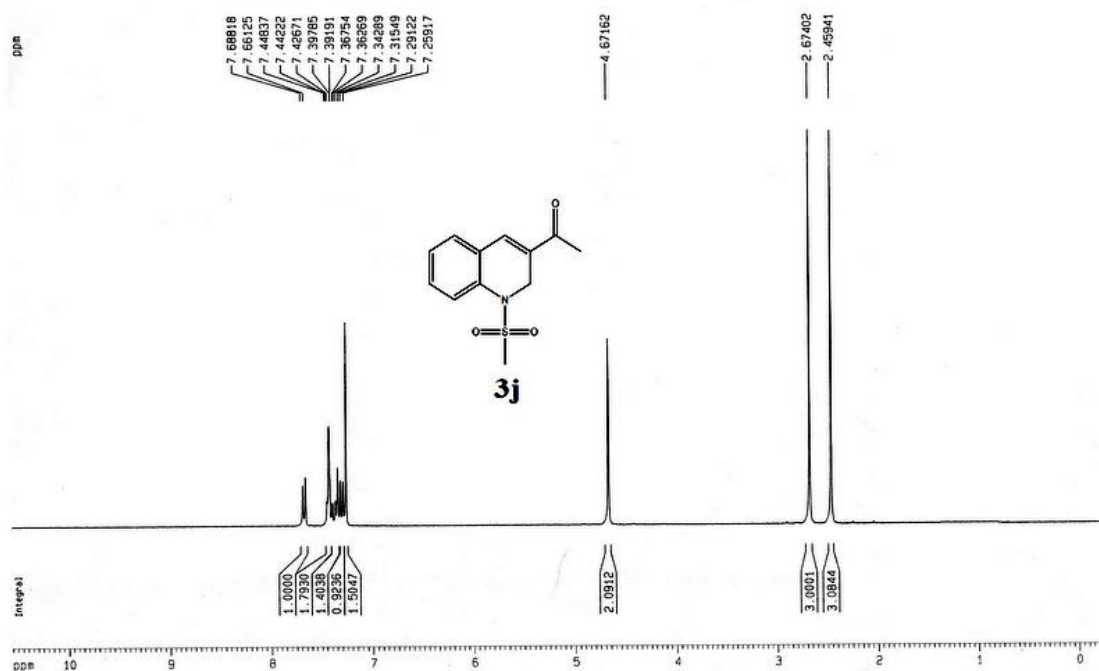

$^{13}\text{C}$  NMR of compound **3j**

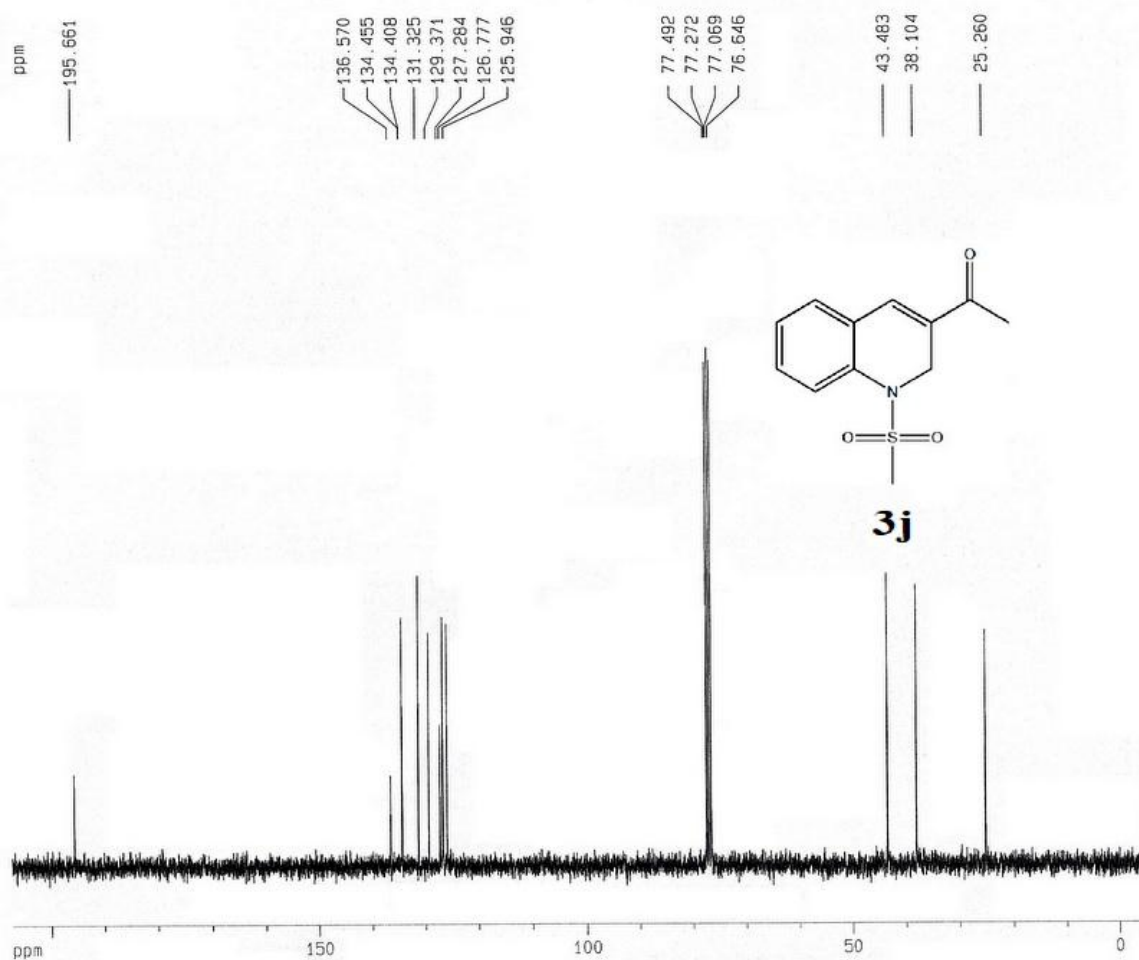

$^1\text{H}$  NMR of compound **5a**

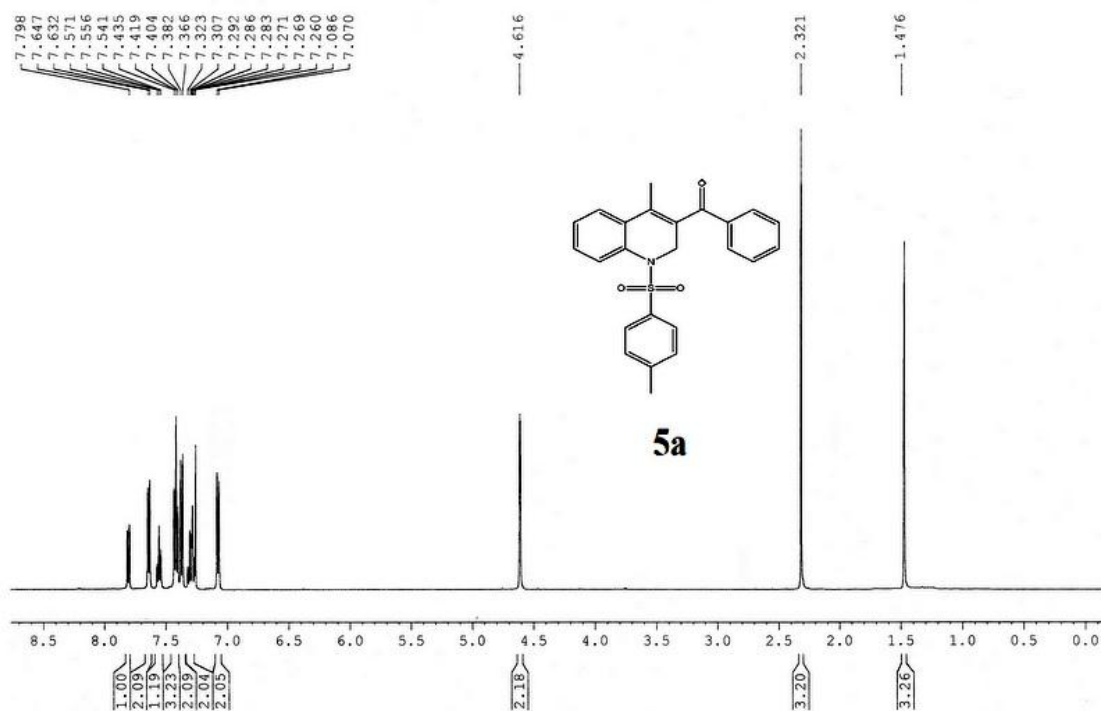

$^{13}\text{C}$  NMR of compound **5a**

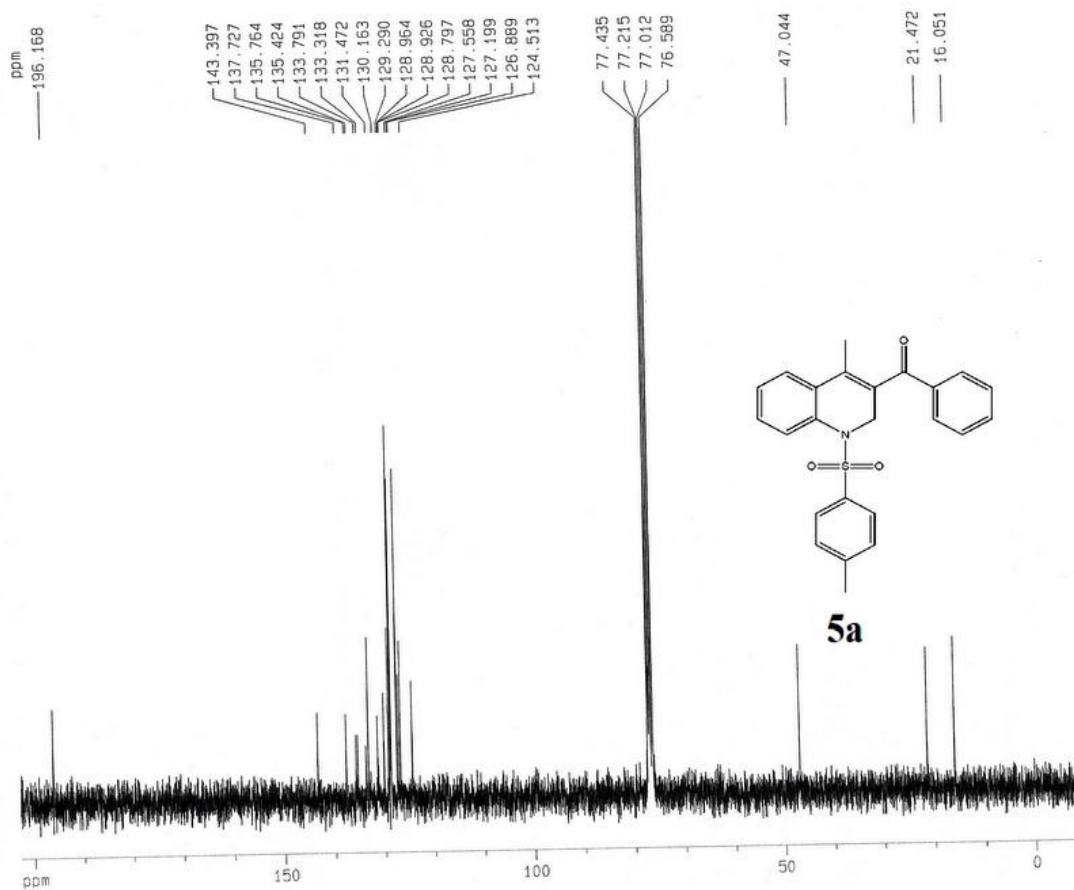

<sup>1</sup>H NMR of compound **5b**

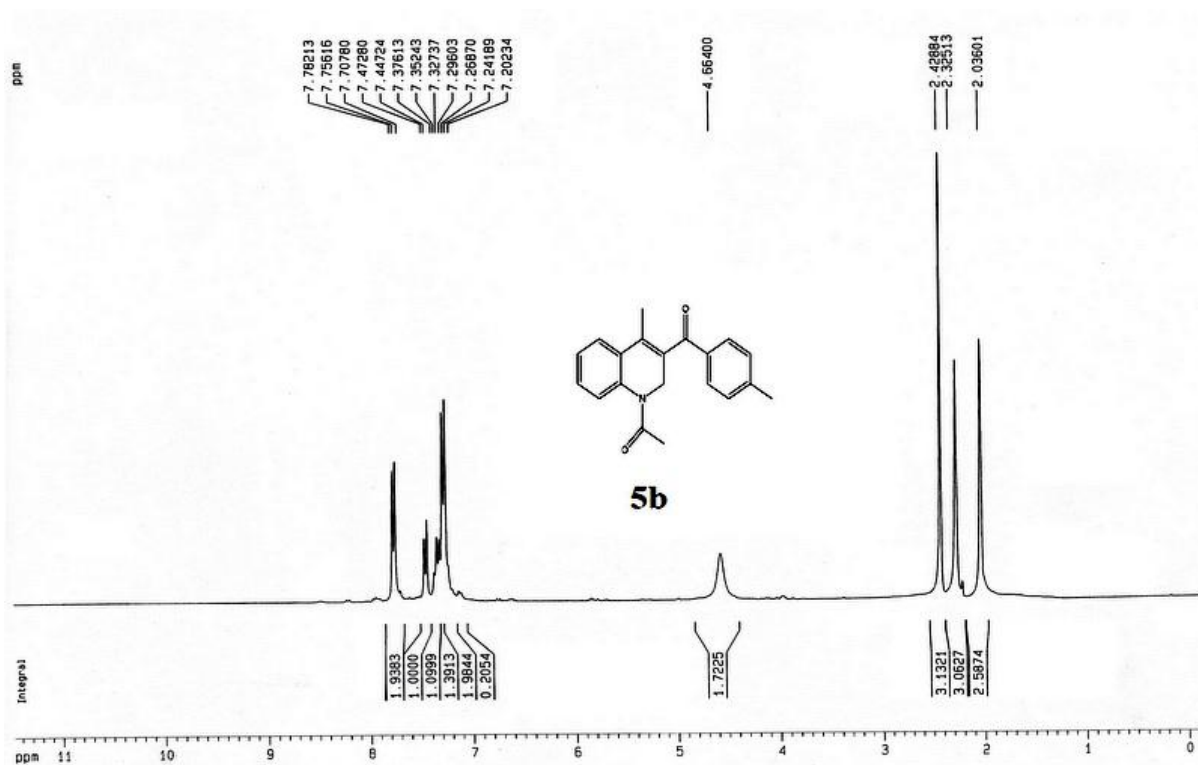

<sup>13</sup>C NMR of compound **5b**

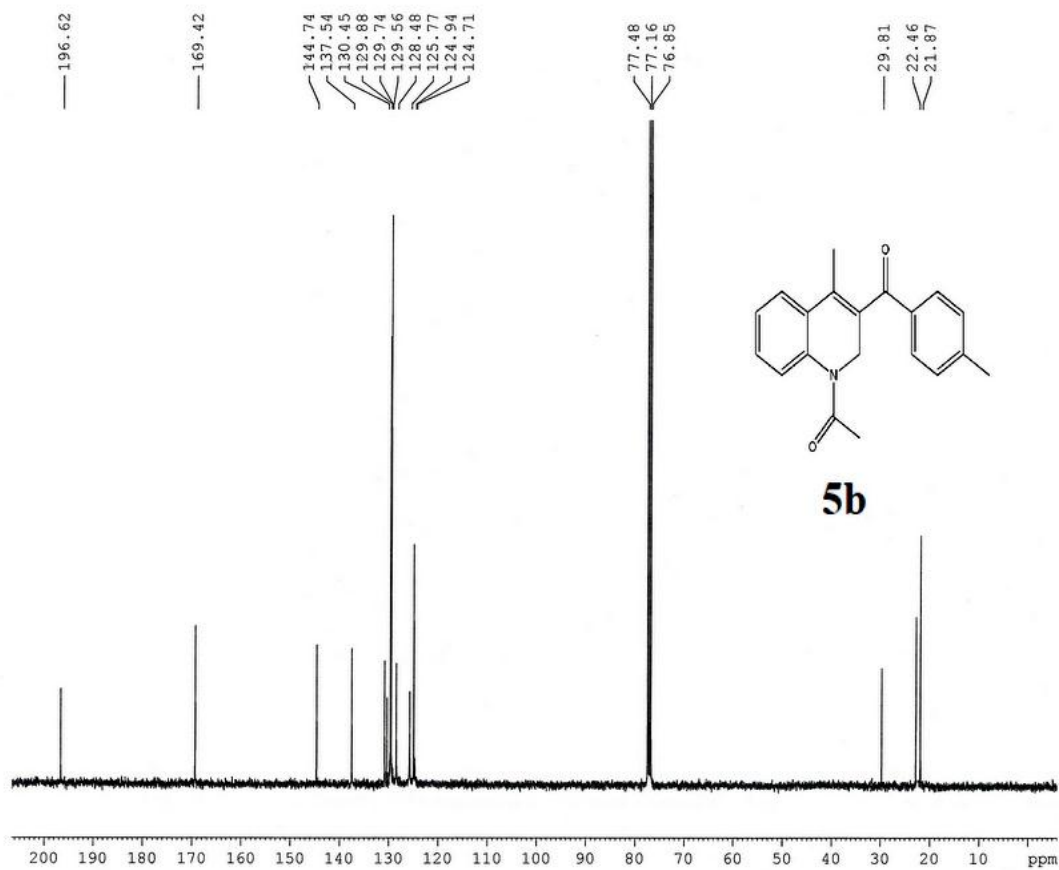

<sup>1</sup>H NMR of compound **6a**

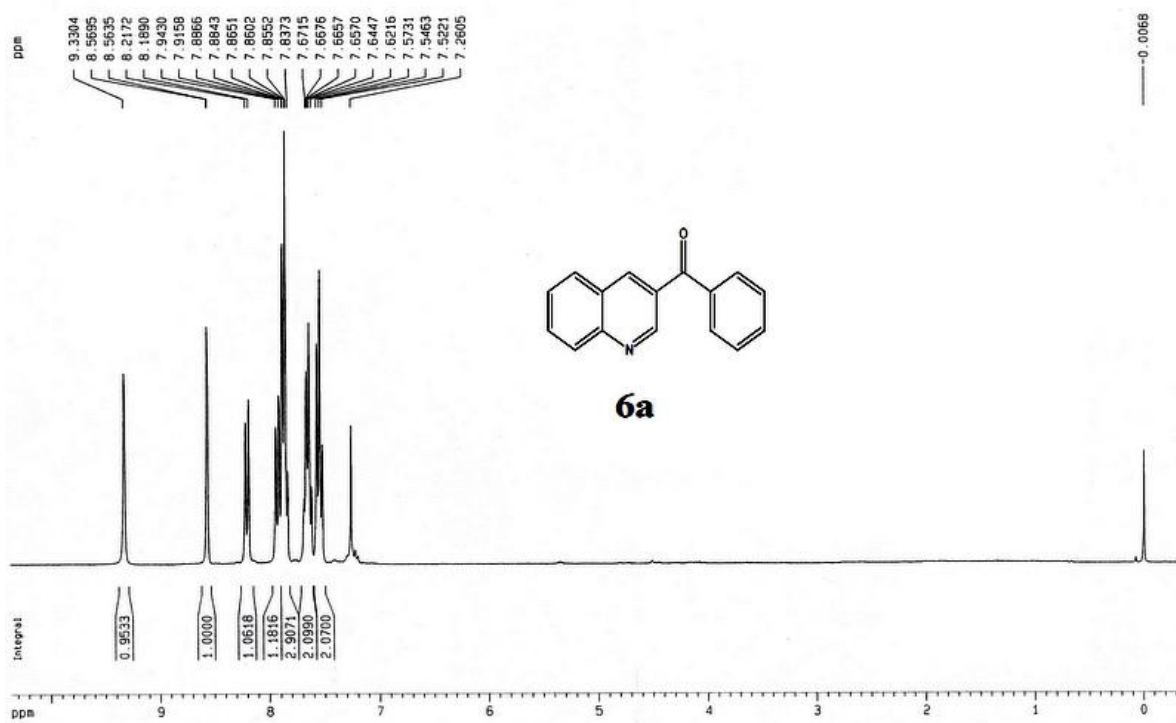

<sup>1</sup>H NMR of compound **6b**

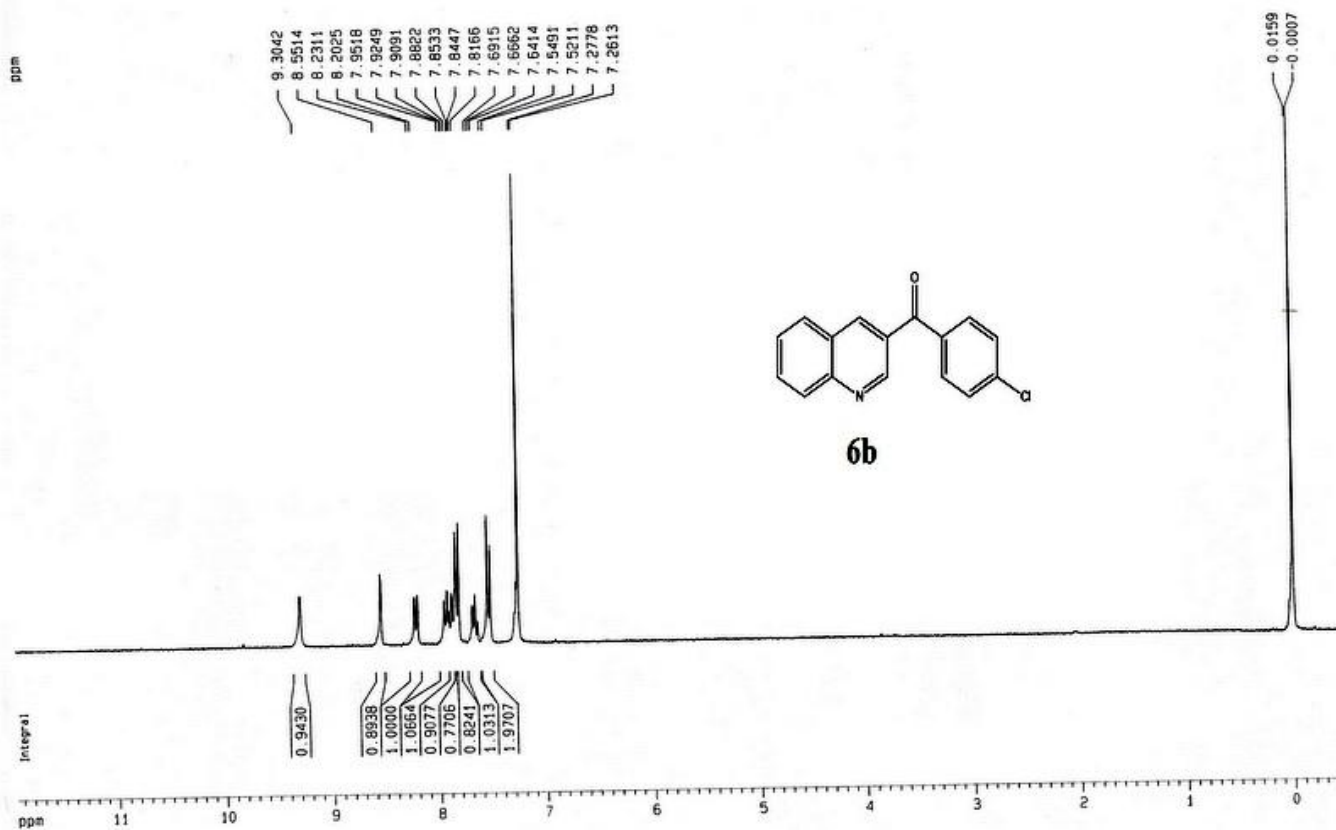

<sup>1</sup>H NMR of compound **6c**

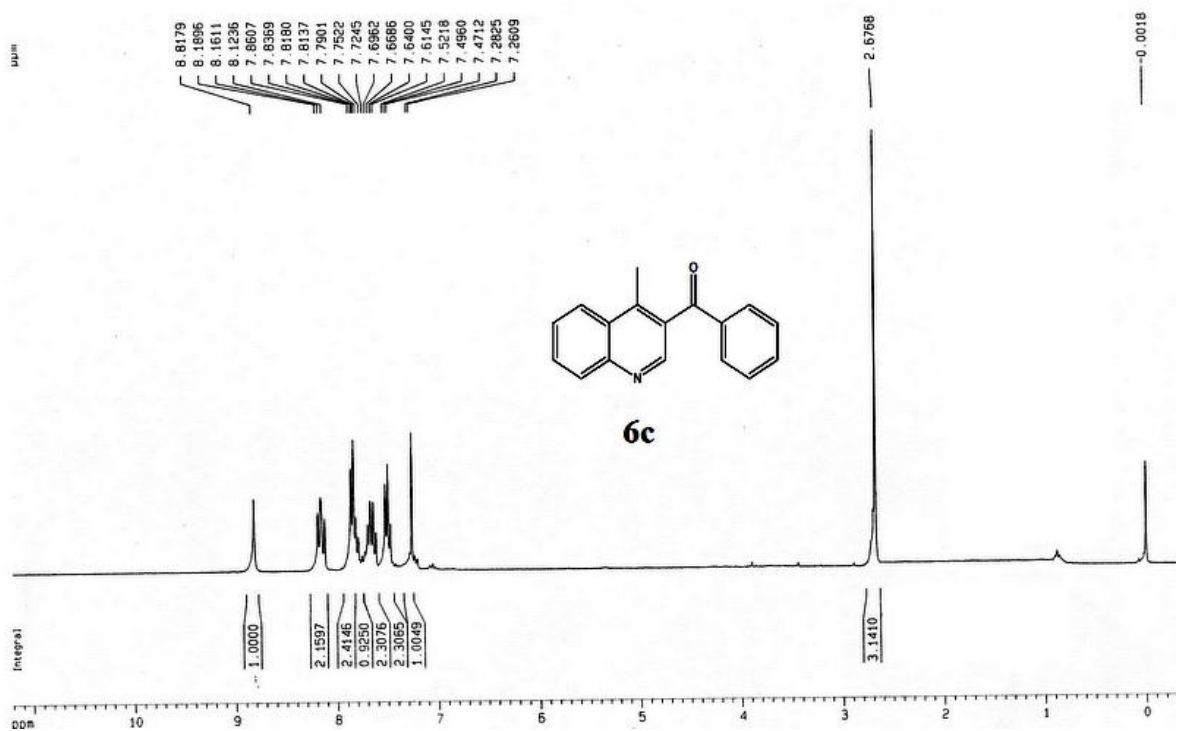

<sup>1</sup>H NMR of compound **7a**

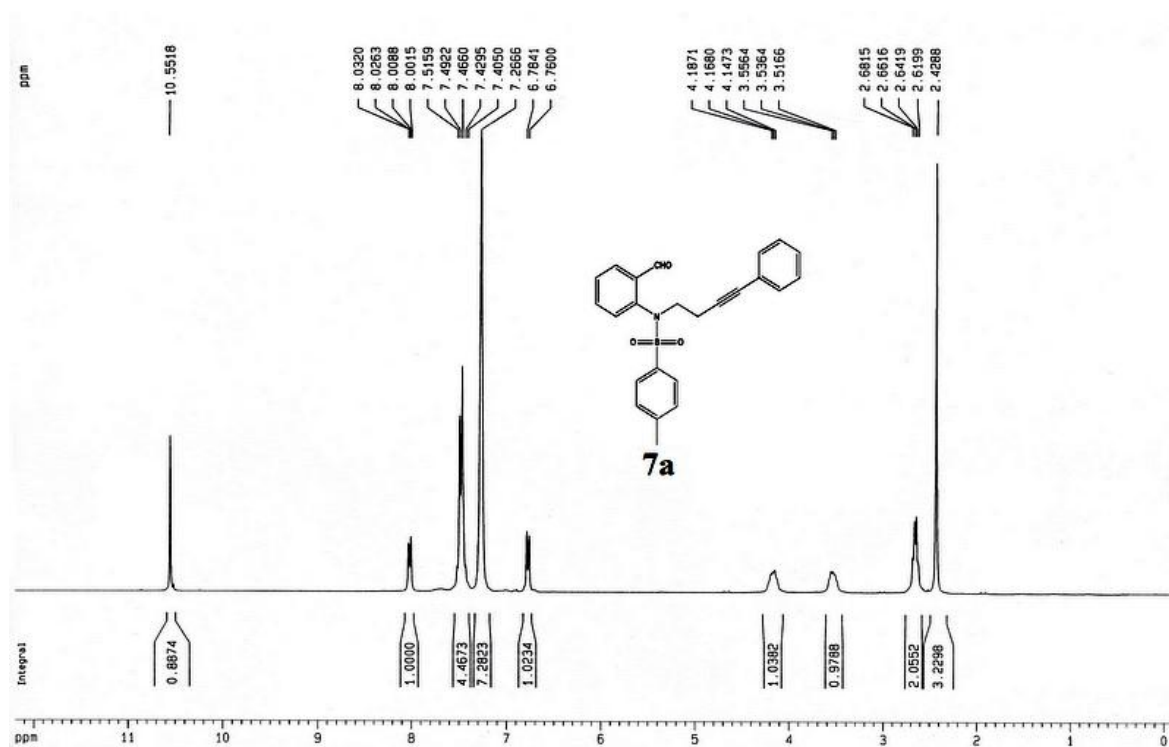

<sup>13</sup>C NMR of compound **7a**

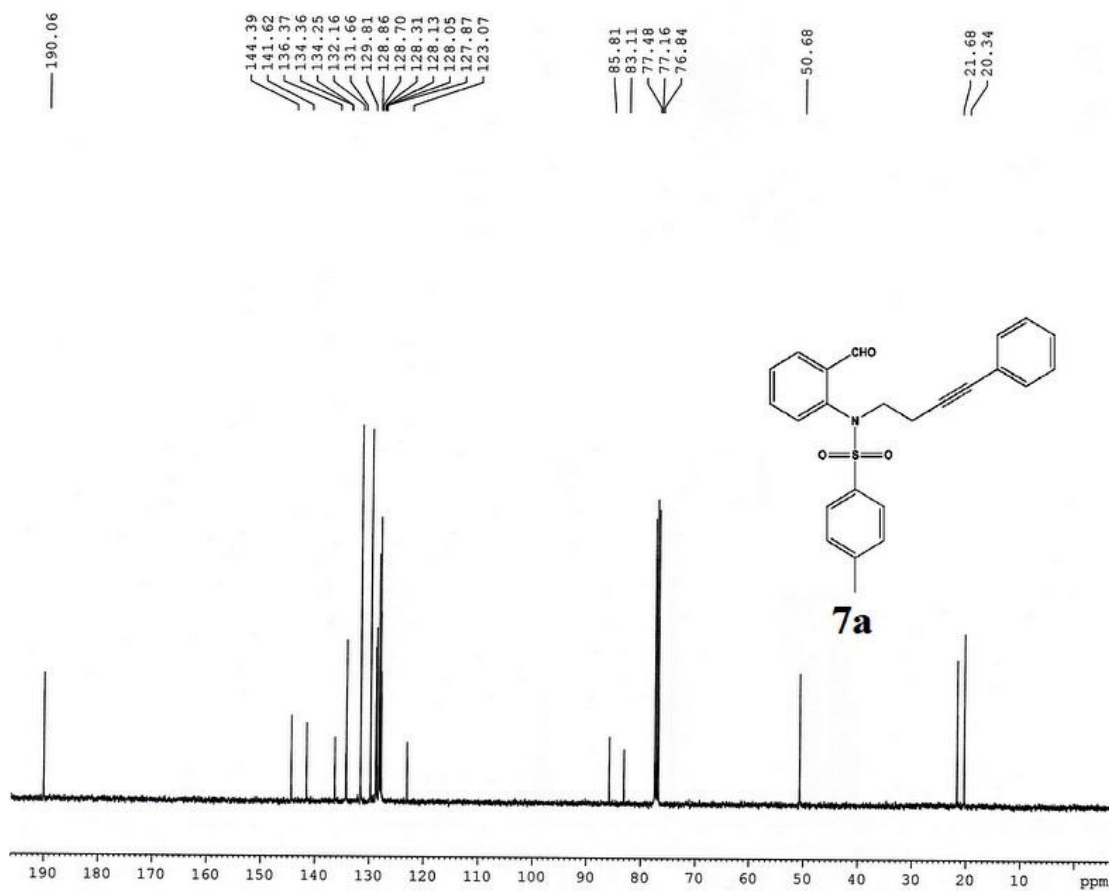

# <sup>1</sup>H NMR of compound **7b**

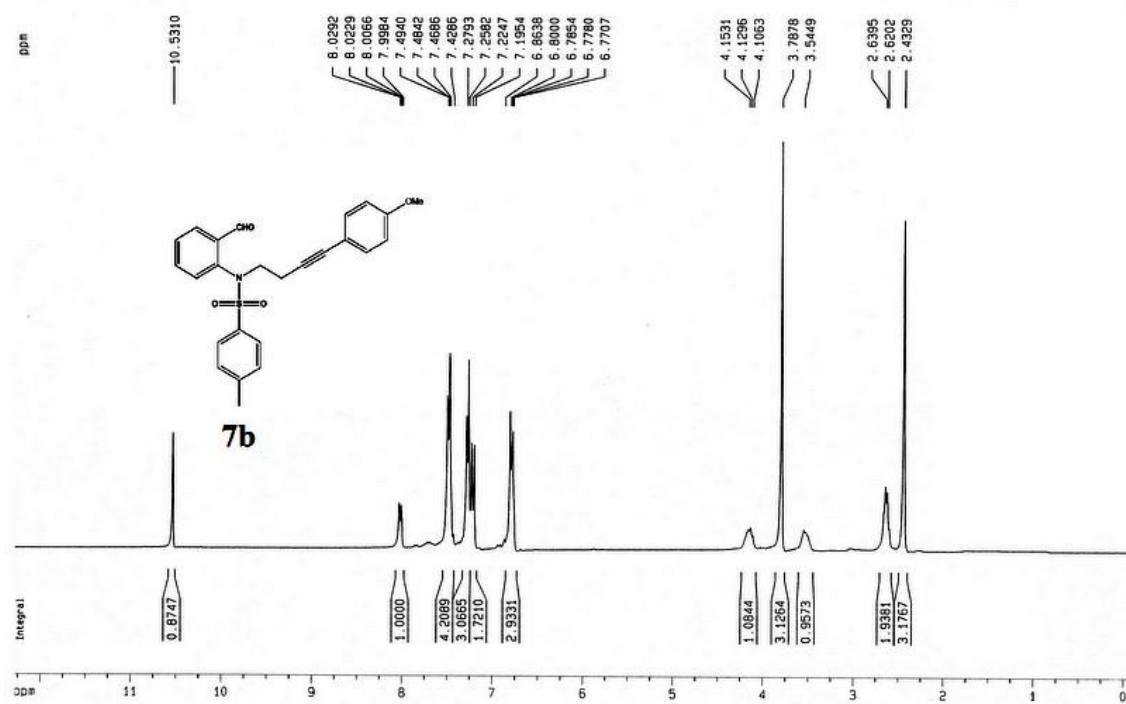

# <sup>13</sup>C NMR of compound **7b**

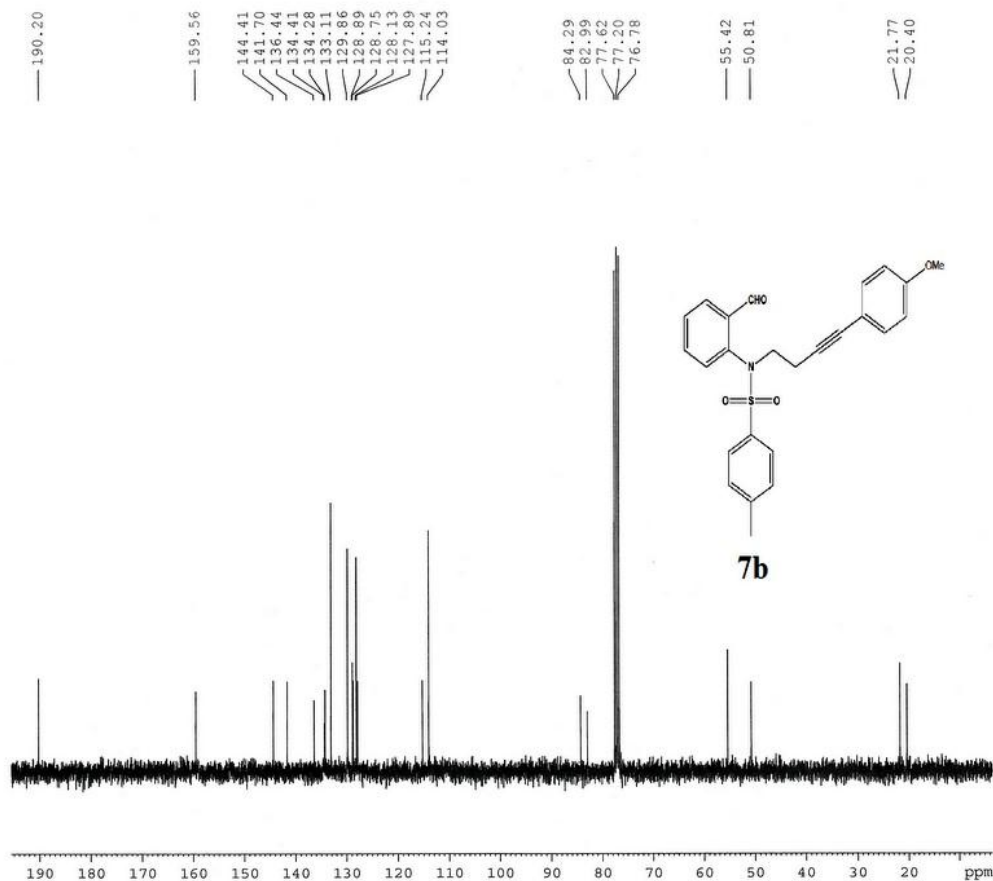



<sup>1</sup>H NMR of compound **7c**

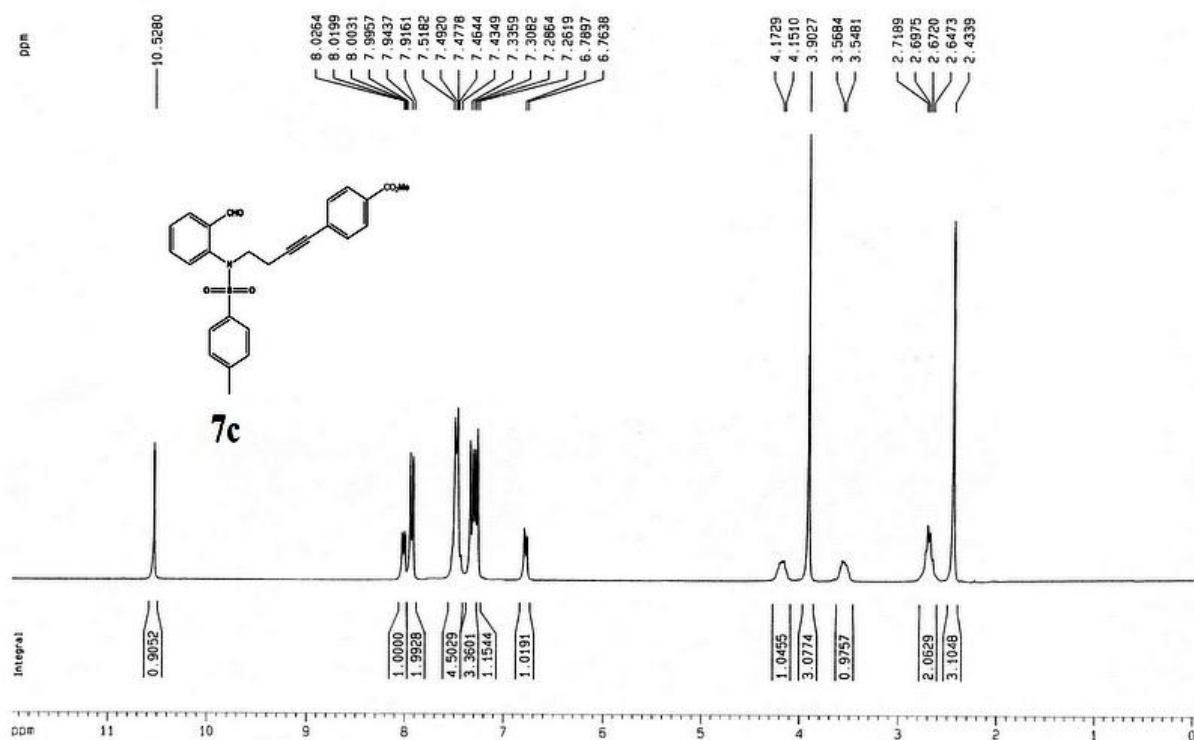

<sup>13</sup>C NMR of compound **7c**

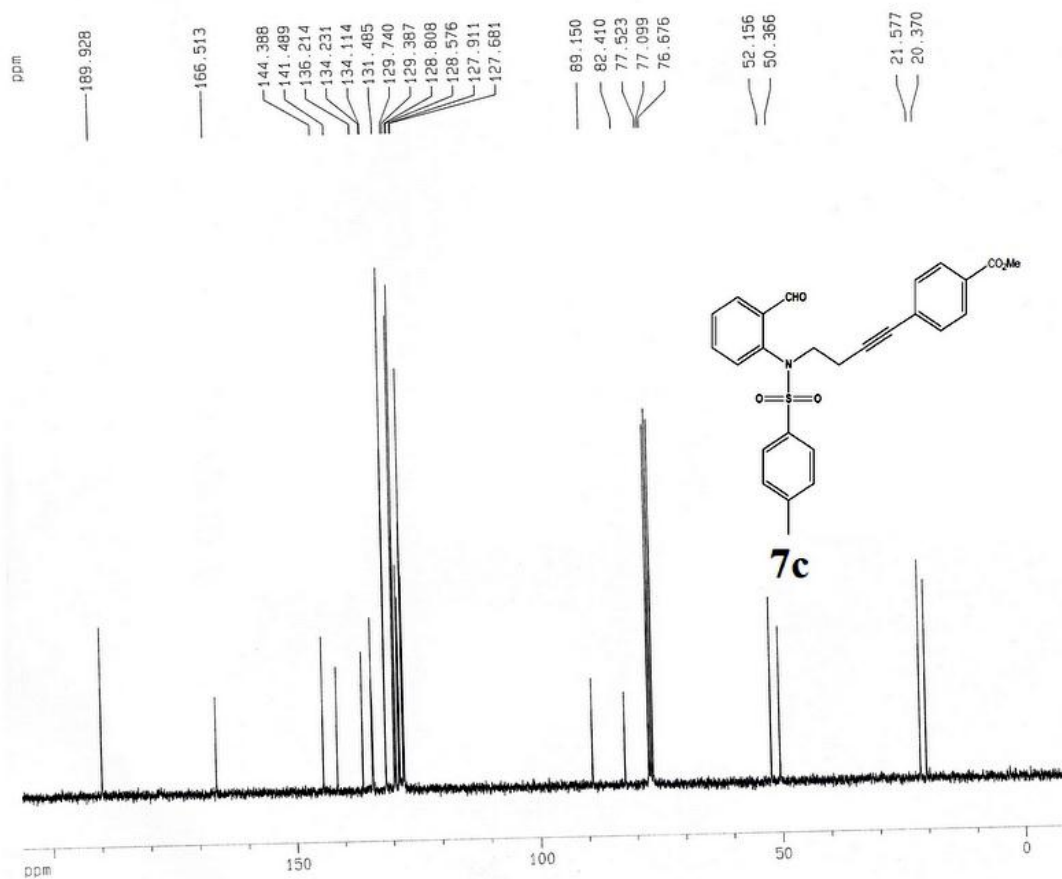

<sup>1</sup>H NMR of compound **7d**

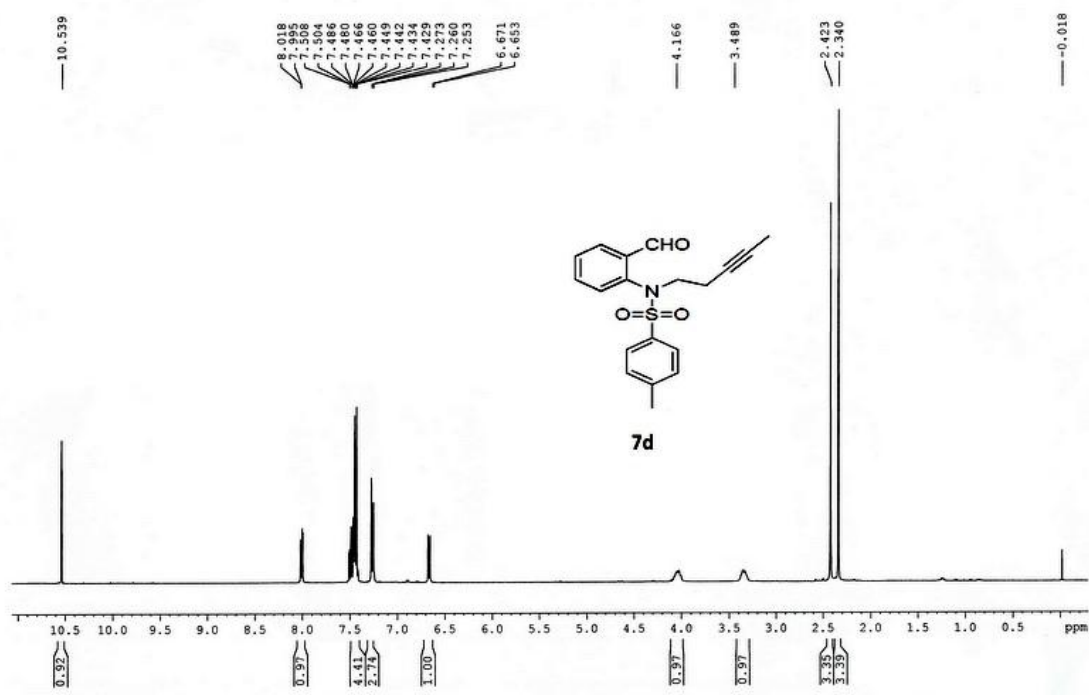

<sup>13</sup>C NMR of compound **7d**

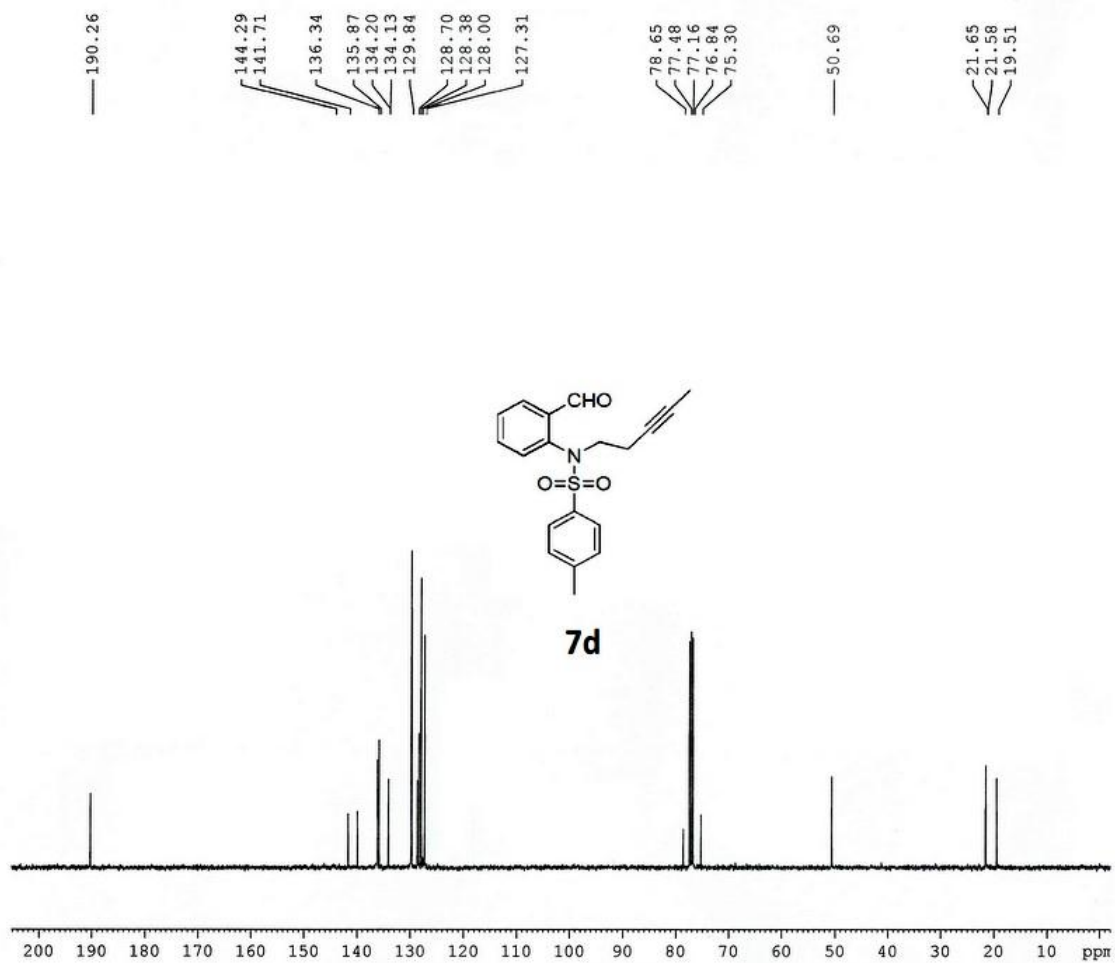

$^1\text{H}$  NMR of compound **8a**

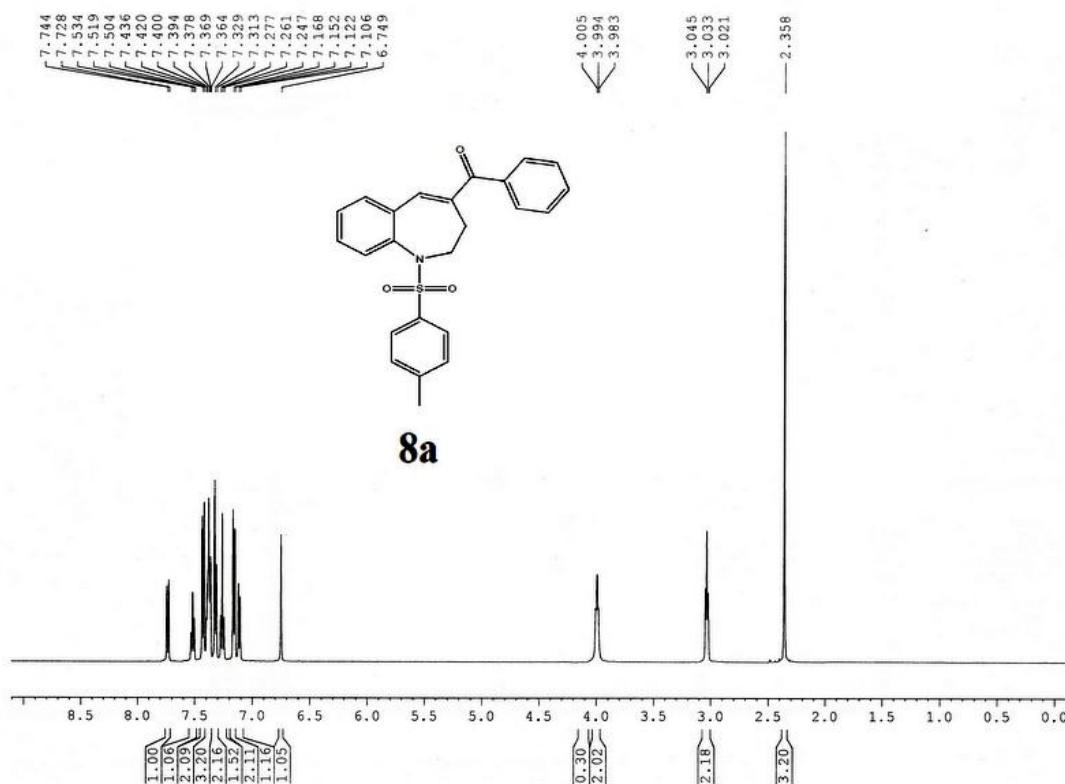

$^{13}\text{C}$  NMR of compound **8a**

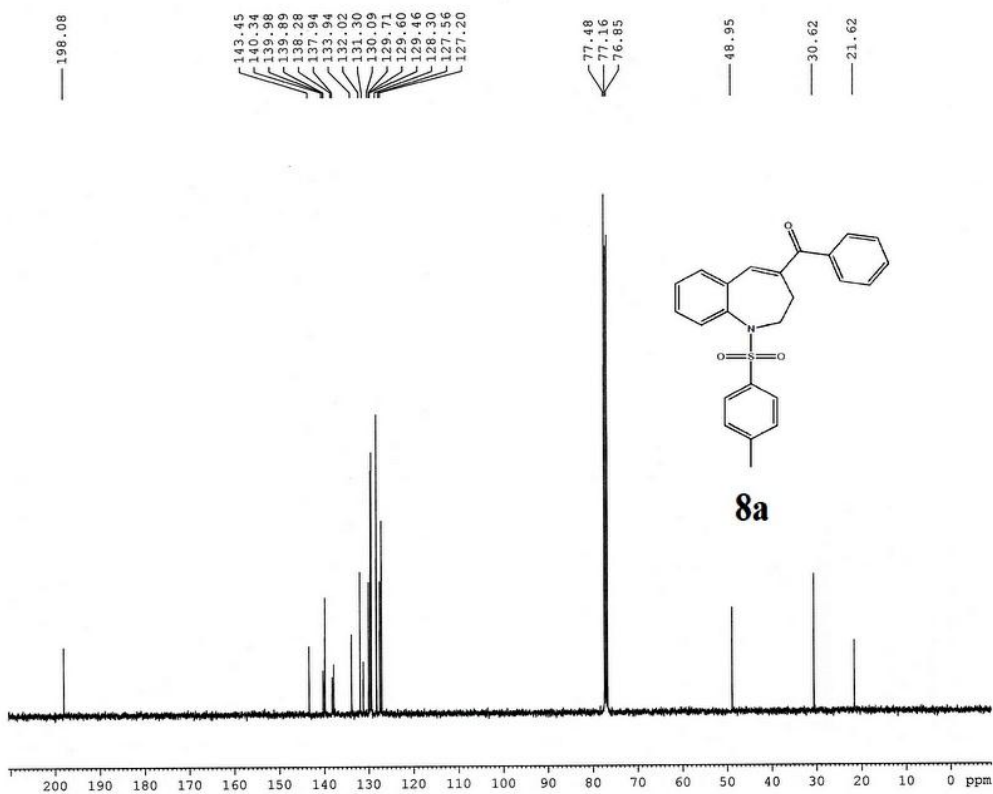

<sup>1</sup>H NMR of compound **8b**

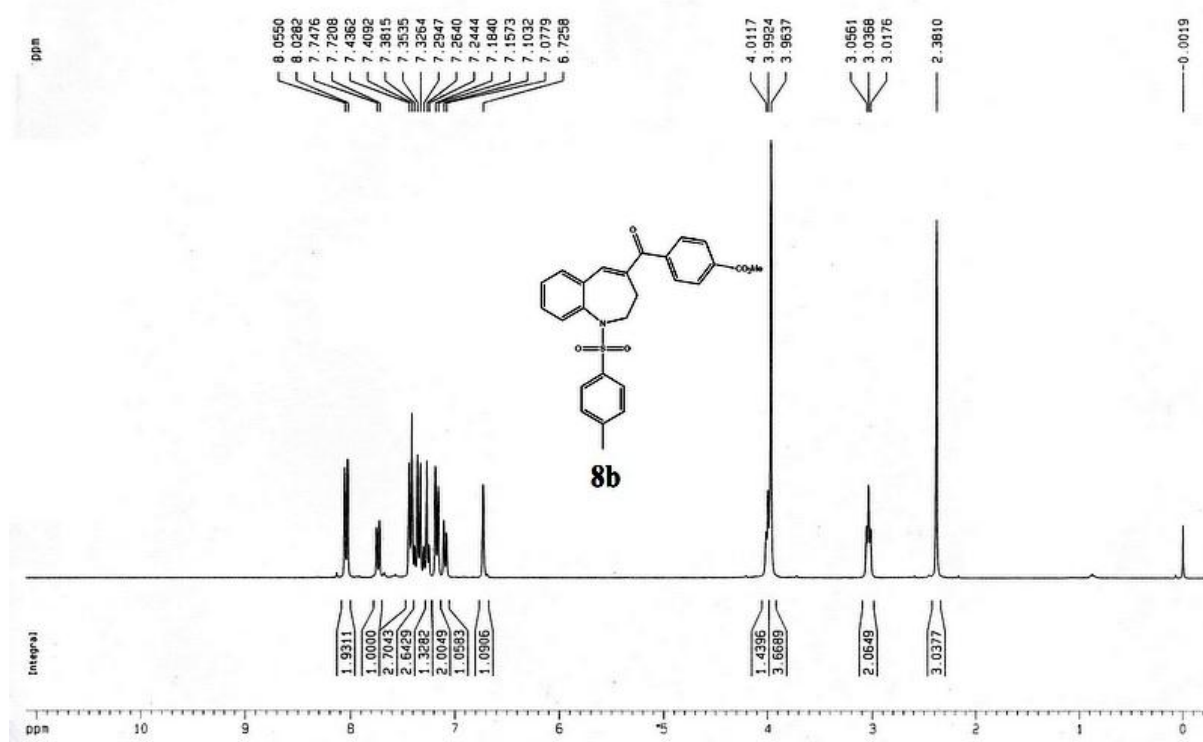

<sup>13</sup>C NMR of compound **8b**

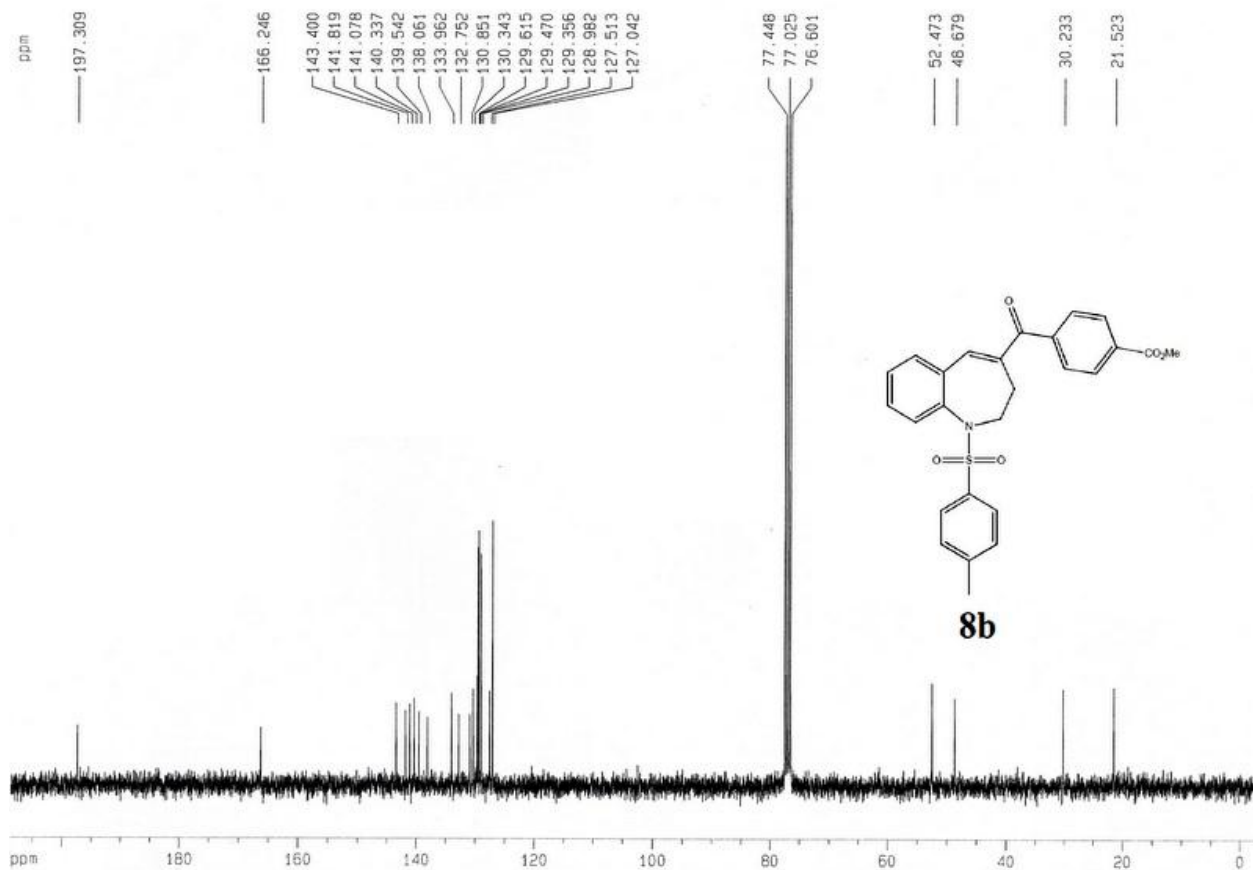

<sup>1</sup>H NMR of compound **8c**

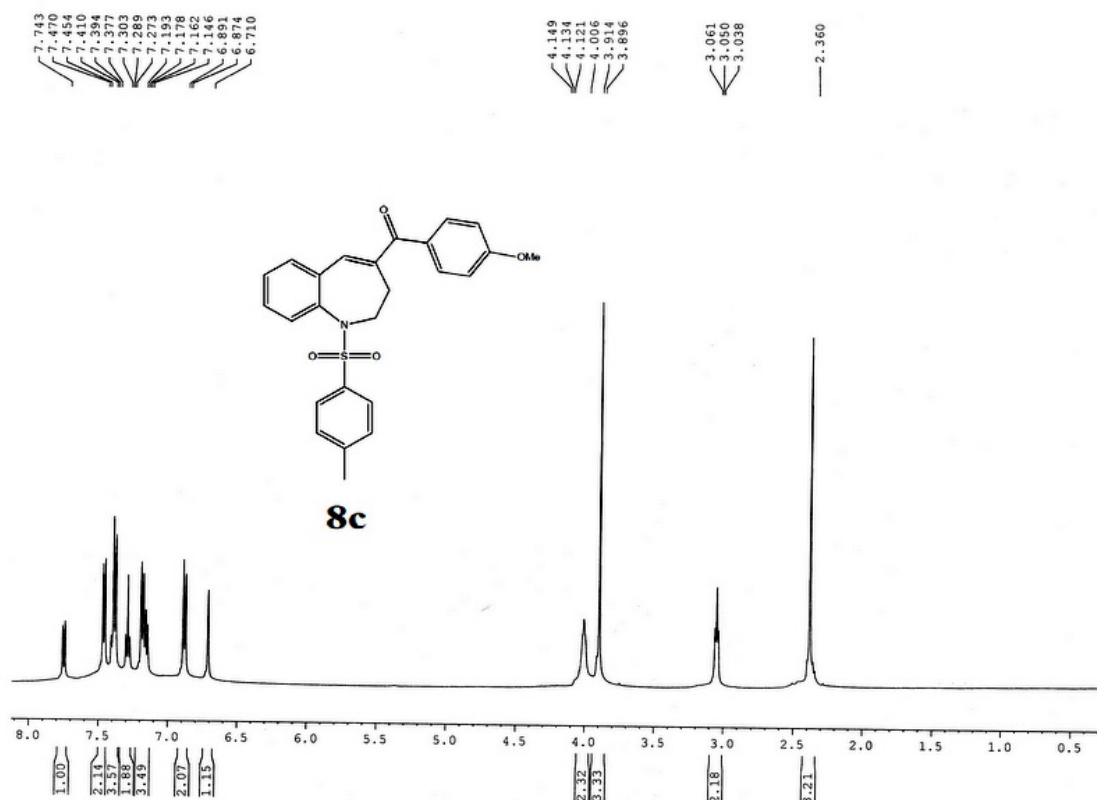

<sup>13</sup>C NMR of compound **8c**

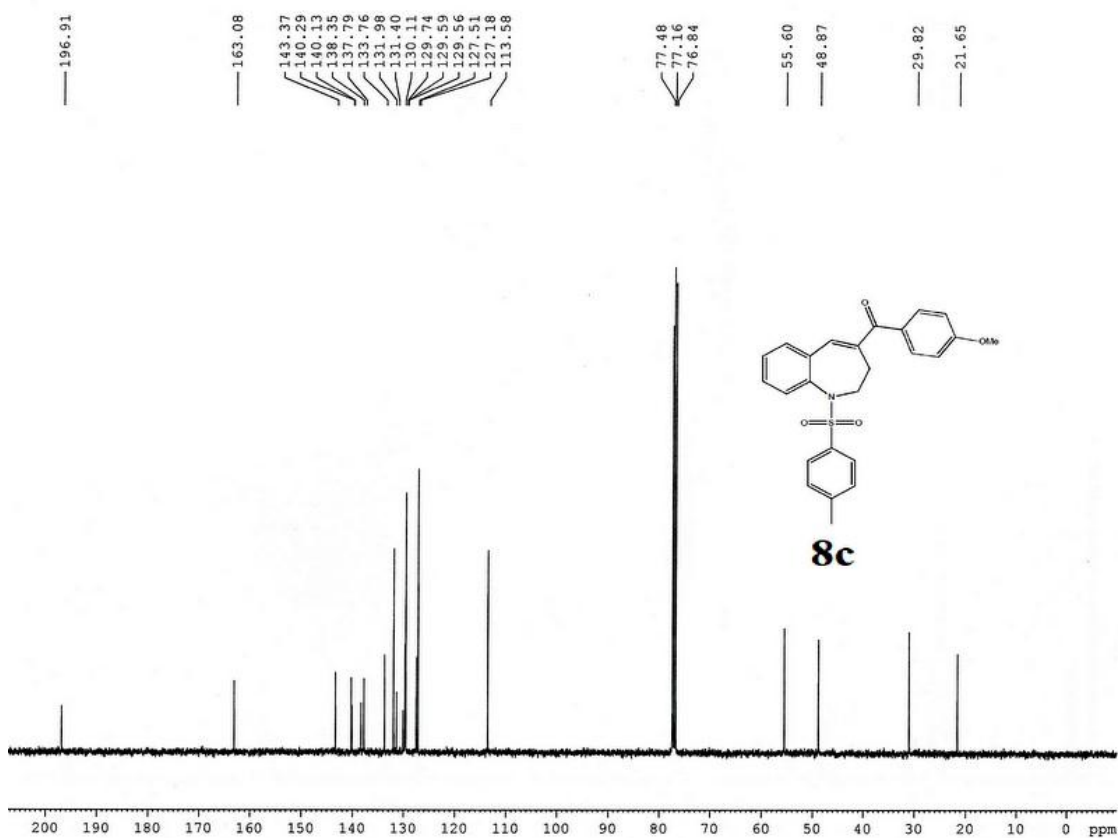

<sup>1</sup>H NMR of compound **8d**

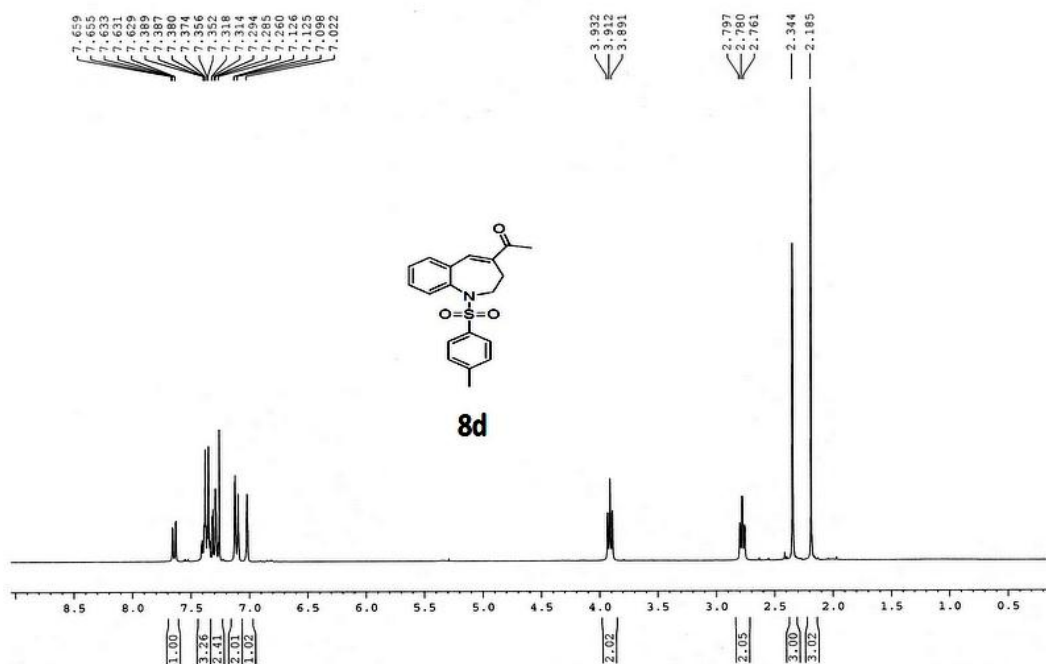

<sup>13</sup>C NMR of compound **8d**

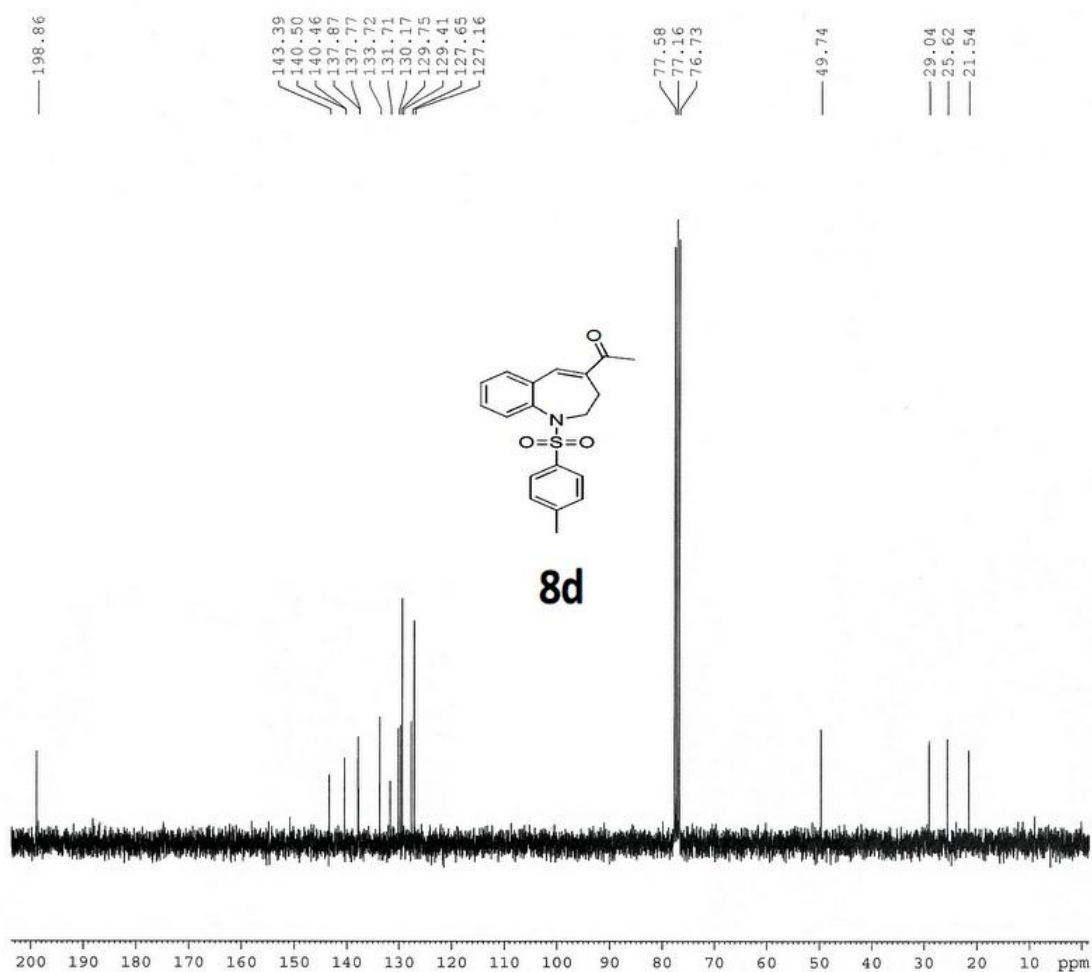

### Crystal structure of **3b**:

#### ORTEP representation of **3b**

Crystallographic data have been deposited in the Cambridge Crystallographic Data Centre (CCDC number **961970**).

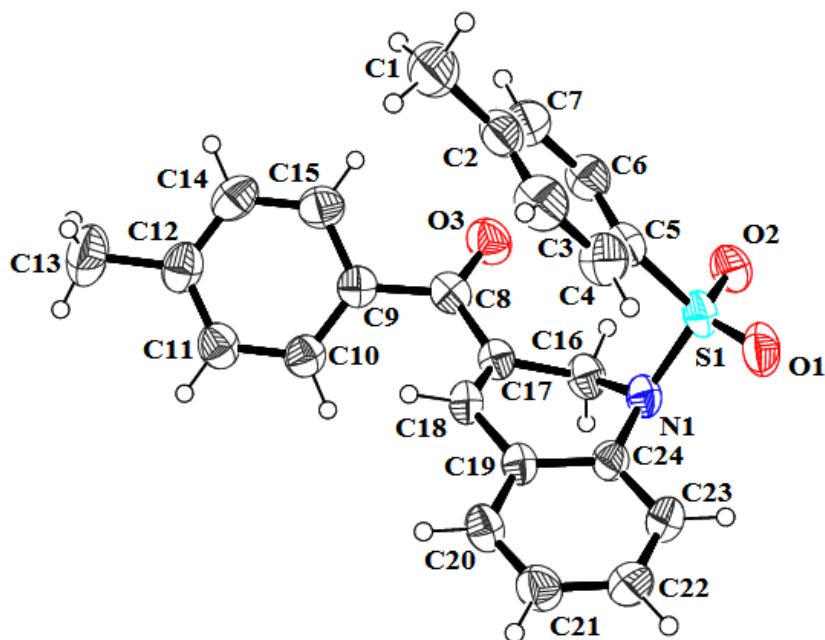

Figure 1. Representations of **3b** showing 40 % probability of thermal ellipsoid.
